# Supplementary material for: MARTX toxin of Vibrio vulnificus induces RBC phosphatidylserine exposure that can contribute to thrombosis
Source: PubMed Central journal article supplement (PMC9385741; doi:10.1038/s41467-022-32599-0), 2022-08-17
Supplement: 41467_2022_32599_MOESM1_ESM.pdf [file 41467_2022_32599_MOESM1_ESM.pdf]

## Supplementary information

### MARTX toxin of *Vibrio vulnificus* induces RBC phosphatidylserine exposure that can contribute to thrombosis

Han Young Chung<sup>1,2</sup>, Yiyang Bian<sup>3</sup>, Kyung-Min Lim<sup>4</sup>, Byoung Sik Kim<sup>5</sup>,  
and Sang Ho Choi<sup>1,2\*</sup>

<sup>1</sup> National Research Laboratory of Molecular Microbiology and Toxicology, Department of Agricultural Biotechnology, Seoul National University, Seoul 08826, Republic of Korea

<sup>2</sup> Center for Food and Bioconvergence, Seoul National University, Seoul 08826, Republic of Korea

<sup>3</sup> School of Public Health, China Medical University, Shenyang 110122, People's Republic of China

<sup>4</sup> College of Pharmacy, Ewha Womans University, Seoul 03760, Republic of Korea

<sup>5</sup> Department of Food Science and Engineering, Ewha Womans University, Seoul 03760, Republic of Korea

\*Correspondence: choish@snu.ac.kr

## Supplementary figure legends:

**Supplementary Fig. 1 Shape changes of RBCs infected with *V. vulnificus*.** RBCs were infected with *V. vulnificus* at various MOIs and incubated for 1 h. *V. vulnificus* only (left) and the shape changes of the human RBCs infected with *V. vulnificus* (red arrowheads) at various MOIs and incubated for 1 h (right) were analyzed by TEM. The representative images by TEM among 5 independent experiments were presented. Red arrowhead indicates *V. vulnificus*; white arrow, echinocyte; and white arrowhead, spherocyte. Scale bar is presented. MOI, multiplicity of infection; and TEM, transmission electron microscopy.

**Supplementary Fig. 2 Effects of *V. vulnificus* on the MV generation, and PS exposure of human RBCs.** a, b RBCs were infected with *V. vulnificus* at various MOIs and different incubation times. MV generation (a) and PS exposure (b) were determined (n=6, two-way analysis of variance (ANOVA) followed by Duncan's multiple range test). The means  $\pm$  SE were calculated from at least five independent experiments. Control, uninfected; MOI, multiplicity of infection; PS, phosphatidylserine; and MV, microvesicle.

**Supplementary Fig. 3 Effect of purified Annexin V on thrombin generation in *V. vulnificus*-infected RBCs.** Human RBCs were incubated in the presence or absence of purified Annexin V for 10 min. And then, the pre-incubated RBCs were infected with *V. vulnificus* at 5, and 10 MOIs for 30 min, and thrombin generation were determined (n=5, two-tailed Student's *t*-test). The means  $\pm$  SE. were calculated from at least five independent experiments. Control, uninfected; and MOI, multiplicity of infection.

**Supplementary Fig. 4 Characteristics of the *V. vulnificus* mutant strains used in the study.** a Schematic diagrams of the *rtxA* structural gene of the *V. vulnificus* WT, *rtxA::nptI*

mutant, and revertant strains. The *rtxA::nptI* mutant carries the *nptI* gene cassette inserted at the 5'-end of *rtxA* and produces no MARTX toxin. The revertant carries the WT *rtxA* gene restored from the *rtxA::nptI* by removing the *nptI* insertion as indicated with dimmed symbol, and thus produces the WT-MARTX toxin. Arrows indicate transcriptional directions of each gene. **b, c** Human RBCs were infected with different strains of *V. vulnificus* at an MOI of 10 and incubated for 1 h, and then PS exposure (**b**) (n=5, two-tailed Student's *t*-test) and thrombin generation (**c**) (n=6, two-tailed Student's *t*-test) were determined. **d** Human epithelial cells (HeLa cells, 1 x 10<sup>5</sup> cells) originally purchased from ATCC (CCL-2) were infected with different strains of *V. vulnificus* at an MOI of 10 and incubated for 150 min, and then bleb formation (red arrowheads) was observed. Scale bar is presented. The means ± SE. were calculated from at least five independent experiments. WT, wild type;  $\Delta$ *rtxA*, a mutant producing no MARTX toxin; *rtxA::nptI*, a mutant producing no MARTX toxin; Rev, a revertant producing the WT-MARTX toxin; *nptI*, aminoglycoside 3'-phosphotransferase gene; *EF-rtxA*, a mutant producing the EF-MARTX toxin; PS, phosphatidylserine; control, uninfected; and MOI, multiplicity of infection.

Supplementary Fig. 1

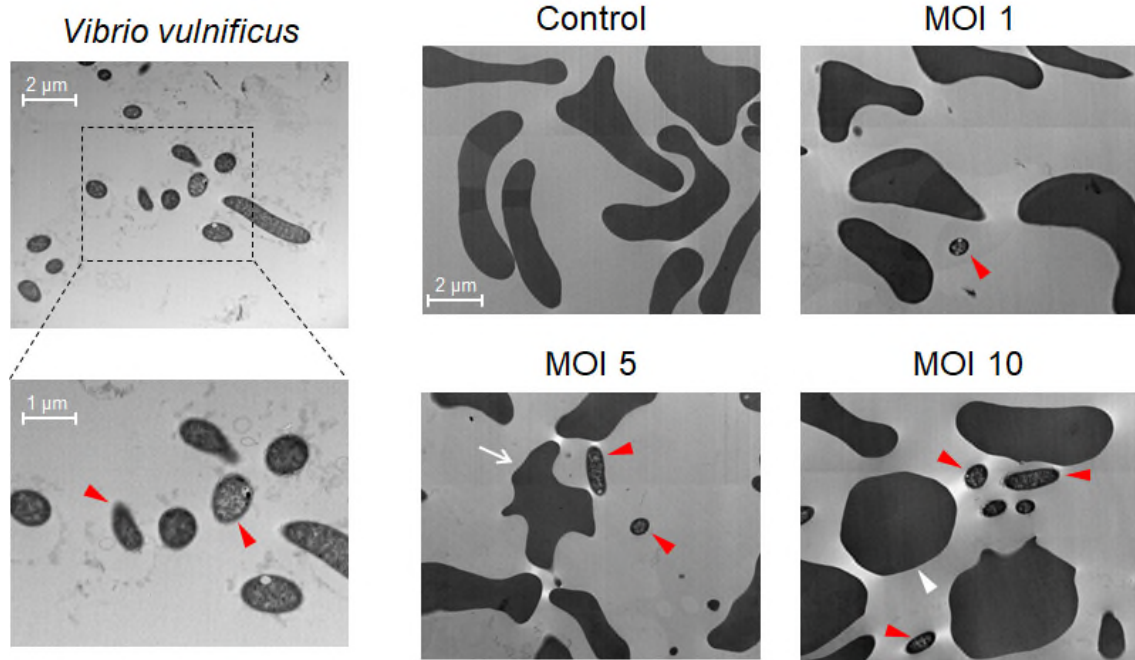

Supplementary Fig. 2

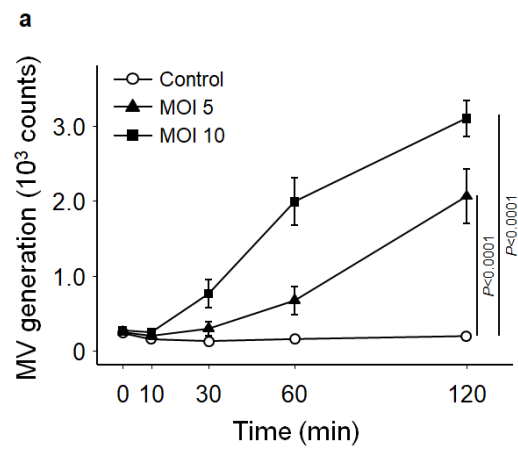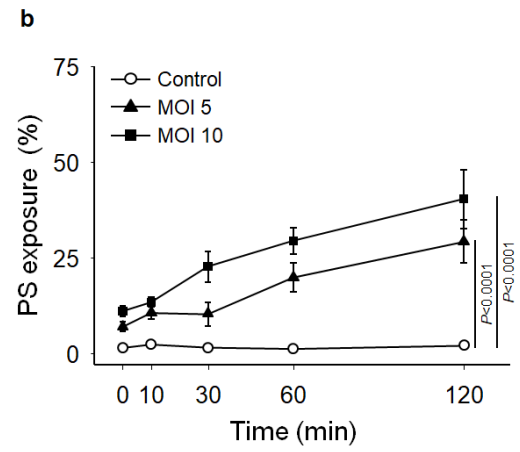

Supplementary Fig. 3

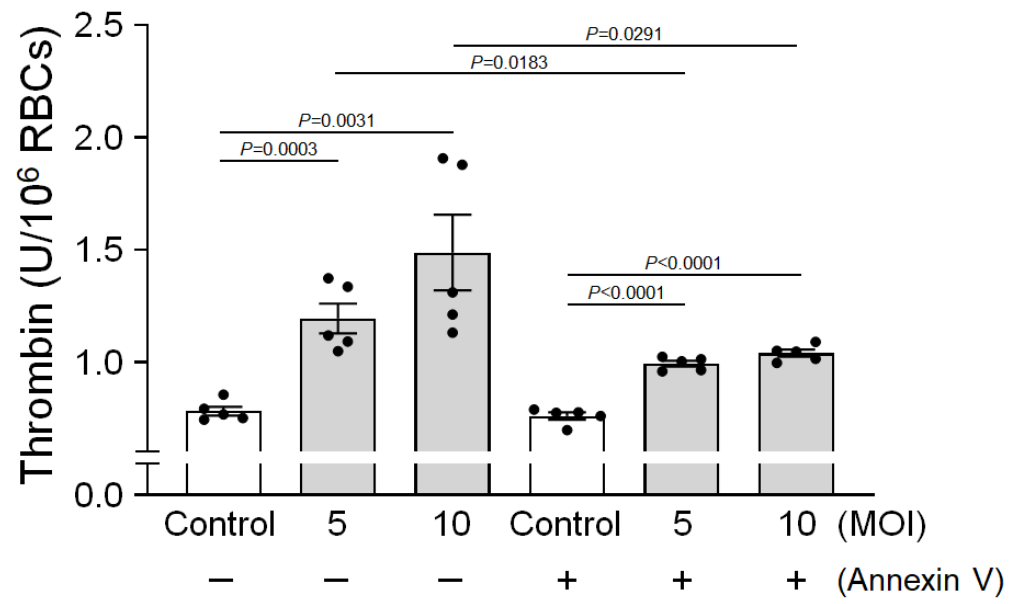

## Supplementary Fig. 4

a

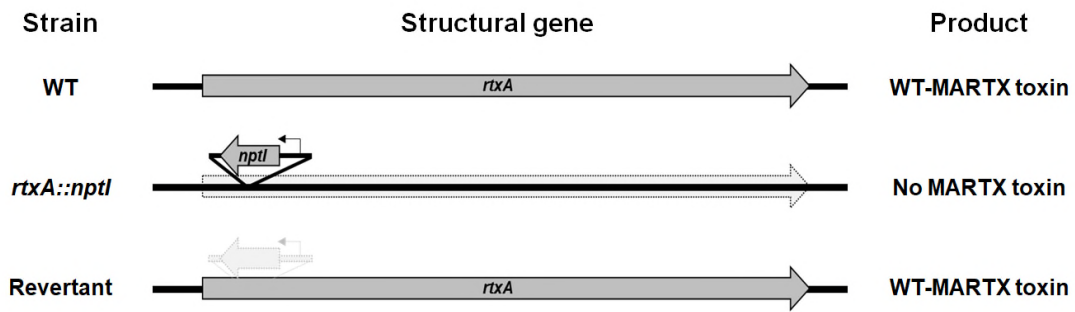

b

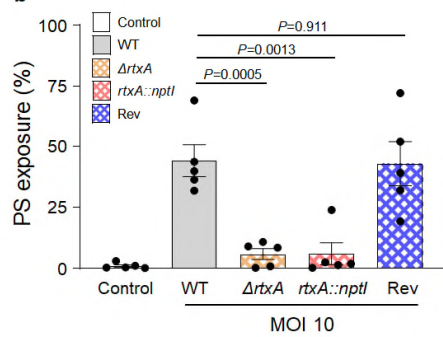

c

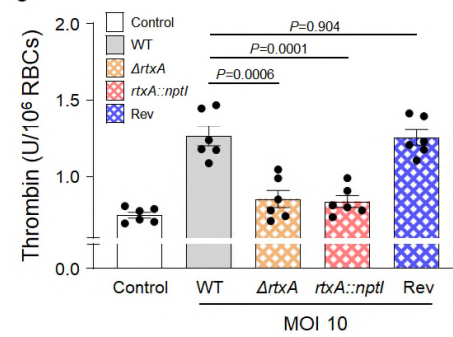

d

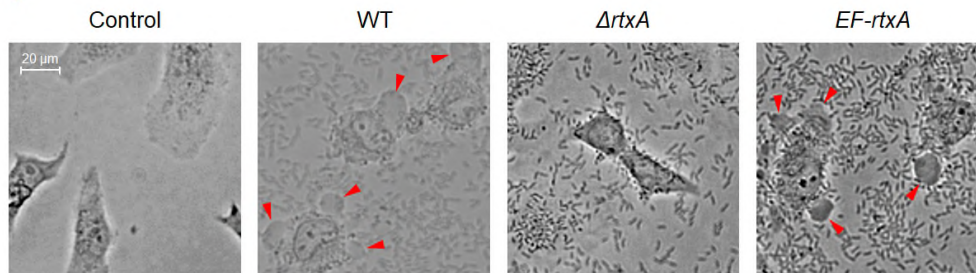

**Supplementary Table 1 Bacterial strains and plasmids used in this study**

| Strain or plasmid        | Relevant characteristics <sup>a</sup>                                                                                                                                   | Reference or source                  |
|--------------------------|-------------------------------------------------------------------------------------------------------------------------------------------------------------------------|--------------------------------------|
| <b>Bacterial strains</b> |                                                                                                                                                                         |                                      |
| <i>Vibrio vulnificus</i> |                                                                                                                                                                         |                                      |
| WT                       | Clinical isolate MO6-24/O, wild type, WT-MARTX toxin                                                                                                                    | (Wright et al., 1990) <sup>1</sup>   |
| <i>ΔrtxA</i>             | MO6-24/O with <i>ΔrtxA::nptI</i> , Km <sup>r</sup> , no MARTX toxin                                                                                                     | (Lee et al., 2007) <sup>2</sup>      |
| <i>EF-rtxA</i>           | MO6-24/O with <i>EF-rtxA</i> , EF-MARTX toxin                                                                                                                           | This study                           |
| <i>rtxA::nptI</i>        | MO6-24/O with <i>rtxA::nptI</i> , Km <sup>r</sup> , no MARTX toxin                                                                                                      | (Lee et al., 2018) <sup>3</sup>      |
| Revertant                | MO6-24/O with the restored <i>rtxA</i> , Km <sup>s</sup> , WT-MARTX toxin                                                                                               | (Lee et al., 2018) <sup>3</sup>      |
| <i>Escherichia coli</i>  |                                                                                                                                                                         |                                      |
| S17-1 λ pir              | λ <i>pir</i> lysogen, <i>thi pro hsdR hsdM<sup>+</sup> recA</i> RP4-2 Tc::Mu-Km::Tn7, Tp <sup>R</sup> , Sm <sup>R</sup> , host for π-requiring plasmids, conjugal donor | (Simon et al., 1983) <sup>4</sup>    |
| <b>Plasmid</b>           |                                                                                                                                                                         |                                      |
| pDS132                   | <i>oriR6K sacB oriT</i> RP4, Cm <sup>R</sup>                                                                                                                            | (Philippe et al., 2004) <sup>5</sup> |
| pDS_EF-MARTX             | pDS132:: <i>EF-rtxA</i> , Cm <sup>R</sup>                                                                                                                               | (Lee et al., 2019) <sup>6</sup>      |

WT, wild type; <sup>a</sup> Km<sup>r</sup>, kanamycin-resistant; EF, effector-free; Km<sup>s</sup>, kanamycin-sensitive; Tp<sup>R</sup>, Trimethoprim-resistant; Sm<sup>R</sup>, streptomycin-resistant; Cm<sup>R</sup>, chloramphenicol-resistant.



**Supplementary Table 2 List of differentially expressed genes in *V. vulnificus* exposed to human RBCs**

| Locus tag <sup>a</sup>                                   | Annotation                                                          | RLE (DESeq2) |                 | Log <sub>2</sub> fold change | P value  |
|----------------------------------------------------------|---------------------------------------------------------------------|--------------|-----------------|------------------------------|----------|
|                                                          |                                                                     | Control      | Exposed to RBCs |                              |          |
| <b>Up-regulation<sup>b</sup></b>                         |                                                                     |              |                 |                              |          |
| <b>Amino acid transport and metabolism<sup>c</sup></b>   |                                                                     |              |                 |                              |          |
| VVMO6_01726                                              | Homoserine O-succinyltransferase                                    | 136.78       | 369.50          | 1.43                         | 2.56E-28 |
| VVMO6_03431                                              | 2-aminoethylphosphonate                                             | 243.40       | 521.45          | 1.10                         | 2.02E-22 |
| VVMO6_03434                                              | ATP-binding protein                                                 | 311.33       | 781.19          | 1.33                         | 6.42E-40 |
| VVMO6_04200                                              | 2-keto-3-deoxy-D-arabino-Heptulosonate-7-phosphate synthase I alpha | 113.39       | 288.97          | 1.35                         | 1.63E-20 |
| VVMO6_04207                                              | Isochorismate pyruvate-lyase of siderophore biosynthesis            | 32.15        | 94.69           | 1.56                         | 2.88E-11 |
| <b>Carbohydrate transport and metabolism<sup>c</sup></b> |                                                                     |              |                 |                              |          |
| VVMO6_02646                                              | Glycosyltransferase                                                 | 222.26       | 447.00          | 1.01                         | 2.52E-16 |
| VVMO6_03242                                              | Metabolite transporter                                              | 935.99       | 2072.28         | 1.15                         | 1.83E-41 |
| <b>Coenzyme transport and metabolism<sup>c</sup></b>     |                                                                     |              |                 |                              |          |
| VVMO6_01252                                              | Nicotinate phosphoribosyltransferase                                | 536.63       | 1319.58         | 1.30                         | 3.94E-60 |
| VVMO6_03382                                              | Radical SAM family protein HutW                                     | 127.16       | 295.72          | 1.22                         | 8.23E-18 |
| <b>Transcription<sup>c</sup></b>                         |                                                                     |              |                 |                              |          |
| VVMO6_01093                                              | Transcriptional activator MetR                                      | 70.83        | 252.16          | 1.83                         | 4.33E-30 |
| <b>Replication, recombination and repair<sup>c</sup></b> |                                                                     |              |                 |                              |          |
| VVMO6_03779                                              | RstA phage-related replication protein                              | 16.74        | 35.71           | 1.09                         | 2.80E-03 |

---

| <b>Cell wall/membrane/envelope biogenesis<sup>c</sup></b>                        |                                                                      |         |         |      |           |
|----------------------------------------------------------------------------------|----------------------------------------------------------------------|---------|---------|------|-----------|
| VVMO6_03380                                                                      | Ferric siderophore transport system periplasmic binding protein TonB | 7.31    | 17.36   | 1.25 | 1.00E-02  |
| VVMO6_04039                                                                      | Putative outer membrane protein                                      | 1853.30 | 4221.61 | 1.19 | 6.68E-38  |
| <b>Inorganic ion transport and metabolism<sup>c</sup></b>                        |                                                                      |         |         |      |           |
| VVMO6_00202                                                                      | Manganese superoxide dismutase                                       | 109.24  | 315.19  | 1.53 | 5.10E-25  |
| VVMO6_04408                                                                      | Aerobactin siderophore receptor IutA                                 | 99.93   | 209.56  | 1.07 | 3.22E-13  |
| <b>Secondary metabolites biosynthesis, transport and catabolism<sup>c</sup></b>  |                                                                      |         |         |      |           |
| VVMO6_04208                                                                      | 2,3-dihydroxybenzoate-AMP ligase                                     | 64.23   | 214.36  | 1.74 | 2.16E-23  |
| VVMO6_04209                                                                      | Aryl carrier domain                                                  | 5.54    | 15.06   | 1.44 | 1.74E-02  |
| <b>General function prediction only<sup>c</sup></b>                              |                                                                      |         |         |      |           |
| VVMO6_01352                                                                      | Death on curing protein, Doc toxin                                   | 2.16    | 7.04    | 1.71 | 4.35E-02  |
| <b>Intracellular trafficking, secretion, and vesicular transport<sup>c</sup></b> |                                                                      |         |         |      |           |
| VVMO6_01206                                                                      | <i>flp</i> pilus assembly protein CpaB                               | 13.60   | 40.05   | 1.56 | 6.75E-06  |
| <b>Function unknown<sup>c</sup></b>                                              |                                                                      |         |         |      |           |
| VVMO6_01693                                                                      | Tricarboxylate transport protein TctC                                | 320.99  | 1479.75 | 2.20 | 4.36E-147 |
| VVMO6_01696                                                                      | Tricarboxylate transport membrane protein TctA                       | 116.38  | 404.24  | 1.80 | 8.37E-46  |
| <b>Unclassified<sup>c</sup></b>                                                  |                                                                      |         |         |      |           |
| VVMO6_01205                                                                      | Hypothetical protein                                                 | 15.46   | 31.96   | 1.05 | 3.10E-03  |
| VVMO6_01356                                                                      | Hypothetical protein                                                 | 31.98   | 80.23   | 1.33 | 3.34E-07  |

---

|                                                     |                                                    |         |         |       |           |
|-----------------------------------------------------|----------------------------------------------------|---------|---------|-------|-----------|
| <b>VVMO6_01694</b>                                  | Hypothetical protein                               | 3.98    | 40.23   | 3.34  | 6.40E-12  |
| <b>VVMO6_01695</b>                                  | Tricarboxylate transport protein TctB              | 32.15   | 142.11  | 2.14  | 2.95E-25  |
| <b>VVMO6_01834</b>                                  | Predicted manganese transporter                    | 53.99   | 167.38  | 1.63  | 8.27E-19  |
| <b>VVMO6_02535</b>                                  | Hypothetical protein                               | 23.50   | 48.17   | 1.04  | 3.65E-04  |
| <b>VVMO6_03008</b>                                  | Hypothetical protein                               | 21.29   | 44.66   | 1.07  | 4.20E-04  |
| <b>VVMO6_03538</b>                                  | Type II/IV secretion system ATPase<br>TadZ/CpaE    | 37.02   | 77.53   | 1.07  | 4.77E-06  |
| <b>VVMO6_03894</b>                                  | Transposase                                        | 4.80    | 13.46   | 1.49  | 2.18E-02  |
| <b>VVMO6_04161</b>                                  | Hypothetical protein                               | 81.05   | 240.29  | 1.57  | 4.25E-22  |
| <b>Iron uptake<sup>d</sup></b>                      |                                                    |         |         |       |           |
| <b>VVMO6_04199</b>                                  | Siderophore biosynthesis                           | 120.07  | 278.71  | 1.21  | 2.39E-18  |
| <b>VVMO6_04201</b>                                  | Catechol siderophore ABC transporter               | 31.81   | 88.13   | 1.47  | 2.87E-09  |
| <b>VVMO6_04206</b>                                  | Siderophore biosynthesis                           | 48.56   | 163.93  | 1.76  | 2.51E-21  |
| <b>VVMO6_04210</b>                                  | Catechol siderophore ABC transporter               | 98.78   | 216.15  | 1.13  | 1.56E-13  |
| <b>Toxin<sup>d</sup></b>                            |                                                    |         |         |       |           |
| <b>VVMO6_03947</b>                                  | MARTX toxin                                        | 1121.50 | 2578.14 | 1.20  | 2.72E-43  |
| <b>Down-regulation<sup>b</sup></b>                  |                                                    |         |         |       |           |
| <b>Energy production and conversion<sup>c</sup></b> |                                                    |         |         |       |           |
| <b>VVMO6_01670</b>                                  | Acylphosphate phosphohydrolase putative            | 4.49    | 0.35    | -3.69 | 2.18E-02  |
| <b>VVMO6_02002</b>                                  | Glutamate symport protein                          | 962.04  | 461.17  | -1.06 | 3.18E-36  |
| <b>VVMO6_02391</b>                                  | Glutamate symport protein                          | 3187.71 | 967.56  | -1.72 | 2.21E-123 |
| <b>VVMO6_03181</b>                                  | Oligopeptide transport ATP-binding protein<br>OppF | 157.11  | 60.11   | -1.39 | 4.93E-13  |
| <b>VVMO6_03847</b>                                  | Nitrite reductase                                  | 109.18  | 46.40   | -1.23 | 8.32E-09  |
| <b>VVMO6_03866</b>                                  | Nitrite reductase                                  | 9012.01 | 4048.87 | -1.15 | 3.44E-05  |

|                                                          |                                                |         |         |       |           |
|----------------------------------------------------------|------------------------------------------------|---------|---------|-------|-----------|
| <b>VVMO6_04094</b>                                       | Ferredoxin-type protein NapF                   | 310.68  | 119.27  | -1.38 | 1.11E-23  |
| <b>VVMO6_04096</b>                                       | Periplasmic nitrate reductase precursor        | 4850.36 | 1241.94 | -1.97 | 3.59E-161 |
| <b>VVMO6_04097</b>                                       | Nitrate reductase cytochrome c550-type subunit | 263.20  | 60.19   | -2.13 | 7.57E-36  |
| <b>VVMO6_04098</b>                                       | Cytochrome c-type protein NapC                 | 378.90  | 83.75   | -2.18 | 9.81E-50  |
| <b>VVMO6_04166</b>                                       | L-lactate permease                             | 3883.93 | 1851.31 | -1.07 | 1.15E-57  |
| <b>Amino acid transport and metabolism<sup>c</sup></b>   |                                                |         |         |       |           |
| <b>VVMO6_00054</b>                                       | Ketol-acid reductoisomerase                    | 9904.53 | 4244.73 | -1.22 | 6.09E-75  |
| <b>VVMO6_00199</b>                                       | Aspartate ammonia-lyase                        | 490.20  | 199.48  | -1.30 | 3.59E-31  |
| <b>VVMO6_01167</b>                                       | Tyrosine-specific transport protein            | 913.90  | 413.44  | -1.14 | 1.44E-36  |
| <b>VVMO6_01655</b>                                       | Sodium/glycine symporter GlyP                  | 951.96  | 346.61  | -1.46 | 1.18E-53  |
| <b>VVMO6_02415</b>                                       | Sodium/alanine symporter                       | 955.08  | 349.24  | -1.45 | 8.05E-53  |
| <b>VVMO6_02533</b>                                       | Sodium/alanine symporter                       | 1281.58 | 456.23  | -1.49 | 2.88E-65  |
| <b>VVMO6_02972</b>                                       | Amino acid ABC transporter                     | 7313.88 | 2351.55 | -1.64 | 2.70E-85  |
| <b>VVMO6_03045</b>                                       | Sodium/dicarboxylate symporter                 | 1255.89 | 548.12  | -1.20 | 1.37E-48  |
| <b>VVMO6_03441</b>                                       | Di-/tripeptide transporter                     | 80.95   | 26.87   | -1.59 | 1.89E-09  |
| <b>VVMO6_03488</b>                                       | Serine transporter                             | 384.21  | 177.75  | -1.11 | 1.59E-18  |
| <b>Carbohydrate transport and metabolism<sup>c</sup></b> |                                                |         |         |       |           |
| <b>VVMO6_00328</b>                                       | Ribulose-phosphate 3-epimerase                 | 359.94  | 173.56  | -1.05 | 1.76E-17  |
| <b>Coenzyme transport and metabolism<sup>c</sup></b>     |                                                |         |         |       |           |
| <b>VVMO6_00730</b>                                       | Multidrug efflux pump component MtrF           | 160.67  | 65.49   | -1.29 | 8.42E-13  |
| <b>VVMO6_02721</b>                                       | Uroporphyrinogen-III methyltransferase         | 6674.09 | 3319.38 | -1.01 | 2.96E-33  |

---

**Lipid transport and metabolism<sup>c</sup>**

|                    |                           |         |         |       |          |
|--------------------|---------------------------|---------|---------|-------|----------|
| <b>VVMO6_00780</b> | Butyryl-CoA dehydrogenase | 2445.81 | 1085.24 | -1.17 | 9.99E-38 |
|--------------------|---------------------------|---------|---------|-------|----------|

**Translation, ribosomal structure and biogenesis<sup>c</sup>**

|                    |                        |       |       |       |         |
|--------------------|------------------------|-------|-------|-------|---------|
| <b>VVMO6_02205</b> | Endoribonuclease L-PSP | 39.83 | 17.42 | -1.19 | 4.79E-4 |
|--------------------|------------------------|-------|-------|-------|---------|

**Transcription<sup>c</sup>**

|                    |                           |        |       |       |          |
|--------------------|---------------------------|--------|-------|-------|----------|
| <b>VVMO6_03062</b> | Transcriptional regulator | 121.32 | 57.39 | -1.08 | 9.48E-08 |
|--------------------|---------------------------|--------|-------|-------|----------|

|                    |                           |        |        |       |          |
|--------------------|---------------------------|--------|--------|-------|----------|
| <b>VVMO6_04439</b> | Transcriptional regulator | 490.02 | 235.65 | -1.06 | 3.40E-21 |
|--------------------|---------------------------|--------|--------|-------|----------|

**Cell wall/membrane/envelope biogenesis<sup>c</sup>**

|                    |                                                  |        |       |       |          |
|--------------------|--------------------------------------------------|--------|-------|-------|----------|
| <b>VVMO6_03345</b> | Capsular polysaccharide synthesis enzyme<br>CpsI | 104.12 | 51.71 | -1.01 | 2.34E-06 |
|--------------------|--------------------------------------------------|--------|-------|-------|----------|

|                    |             |        |        |       |          |
|--------------------|-------------|--------|--------|-------|----------|
| <b>VVMO6_04183</b> | Lipoprotein | 436.29 | 216.01 | -1.01 | 8.75E-19 |
|--------------------|-------------|--------|--------|-------|----------|

**Posttranslational modification, protein turnover, chaperones<sup>c</sup>**

|                    |                                                  |        |        |       |          |
|--------------------|--------------------------------------------------|--------|--------|-------|----------|
| <b>VVMO6_00209</b> | Heat shock protein 60 family co-chaperone<br>Gro | 396.09 | 101.56 | -1.96 | 7.93E-44 |
|--------------------|--------------------------------------------------|--------|--------|-------|----------|

|                    |                                                 |         |         |       |          |
|--------------------|-------------------------------------------------|---------|---------|-------|----------|
| <b>VVMO6_00210</b> | Heat shock protein 60 family chaperone<br>GroEL | 9753.06 | 3465.84 | -1.49 | 1.49E-74 |
|--------------------|-------------------------------------------------|---------|---------|-------|----------|

|                    |                                                        |         |         |       |          |
|--------------------|--------------------------------------------------------|---------|---------|-------|----------|
| <b>VVMO6_00297</b> | ATP-dependent hsl protease ATP-binding<br>subunit HslU | 2433.27 | 1057.85 | -1.20 | 2.10E-53 |
|--------------------|--------------------------------------------------------|---------|---------|-------|----------|

|                    |                             |        |        |       |          |
|--------------------|-----------------------------|--------|--------|-------|----------|
| <b>VVMO6_00298</b> | ATP-dependent protease HslV | 553.43 | 150.15 | -1.88 | 9.16E-48 |
|--------------------|-----------------------------|--------|--------|-------|----------|

|                    |                        |          |         |       |          |
|--------------------|------------------------|----------|---------|-------|----------|
| <b>VVMO6_02385</b> | Chaperone protein DnaK | 10047.69 | 4211.13 | -1.25 | 4.91E-65 |
|--------------------|------------------------|----------|---------|-------|----------|

|                    |              |         |         |       |          |
|--------------------|--------------|---------|---------|-------|----------|
| <b>VVMO6_02477</b> | ClpB protein | 6924.19 | 3211.64 | -1.11 | 3.10E-59 |
|--------------------|--------------|---------|---------|-------|----------|

|                    |                             |         |        |       |          |
|--------------------|-----------------------------|---------|--------|-------|----------|
| <b>VVMO6_02966</b> | 16 kDa heat shock protein A | 2949.54 | 632.75 | -2.22 | 8.41E-33 |
|--------------------|-----------------------------|---------|--------|-------|----------|

|                    |                |      |      |       |          |
|--------------------|----------------|------|------|-------|----------|
| <b>VVMO6_04438</b> | Glutaredoxin 3 | 9.24 | 2.54 | -1.86 | 2.41E-02 |
|--------------------|----------------|------|------|-------|----------|

|                    |                                                 |         |         |       |          |
|--------------------|-------------------------------------------------|---------|---------|-------|----------|
| <b>VVMO6_04522</b> | Heat shock protein 60 family chaperone<br>GroEL | 7113.21 | 2770.01 | -1.36 | 1.23E-51 |
|--------------------|-------------------------------------------------|---------|---------|-------|----------|

---

|                                                                                 |                                                            |         |         |       |          |
|---------------------------------------------------------------------------------|------------------------------------------------------------|---------|---------|-------|----------|
| <b>VVMO6_04523</b>                                                              | Heat shock protein 60 family co-chaperone GroES            | 344.60  | 90.14   | -1.93 | 1.29E-32 |
| <b>Inorganic ion transport and metabolism<sup>c</sup></b>                       |                                                            |         |         |       |          |
| <b>VVMO6_00653</b>                                                              | Chromate transport protein ChrA                            | 102.39  | 50.56   | -1.02 | 1.47E-06 |
| <b>VVMO6_00937</b>                                                              | Lead, cadmium, zinc and mercury transporting ATPase        | 1652.00 | 799.21  | -1.05 | 2.12E-28 |
| <b>VVMO6_02186</b>                                                              | Ferrous iron transport protein A                           | 10.23   | 2.29    | -2.16 | 8.89E-03 |
| <b>VVMO6_02280</b>                                                              | Lead, cadmium, zinc and mercury transporting ATPase        | 839.91  | 407.86  | -1.04 | 4.27E-22 |
| <b>VVMO6_02509</b>                                                              | Sodium-dependent phosphate transporter                     | 6498.65 | 2385.24 | -1.45 | 2.25E-86 |
| <b>VVMO6_03867</b>                                                              | Nitrate ABC transporter ATP-binding protein                | 2859.99 | 995.43  | -1.52 | 8.29E-09 |
| <b>VVMO6_03868</b>                                                              | Nitrate ABC transporter permease protein                   | 2815.34 | 668.68  | -2.07 | 6.61E-38 |
| <b>VVMO6_03869</b>                                                              | Nitrate ABC transporter nitrate-binding protein            | 4960.46 | 1164.12 | -2.09 | 2.22E-27 |
| <b>VVMO6_04095</b>                                                              | Periplasmic nitrate reductase component NapD               | 442.22  | 123.19  | -1.84 | 6.69E-32 |
| <b>Secondary metabolites biosynthesis, transport and catabolism<sup>c</sup></b> |                                                            |         |         |       |          |
| <b>VVMO6_01992</b>                                                              | Hypothetical protein                                       | 411.85  | 174.84  | -1.24 | 5.60E-25 |
| <b>General function prediction only<sup>c</sup></b>                             |                                                            |         |         |       |          |
| <b>VVMO6_00722</b>                                                              | Sodium-dependent transporter                               | 878.74  | 335.98  | -1.39 | 5.36E-48 |
| <b>VVMO6_02367</b>                                                              | Xanthine/uracil/thiamine/ascorbate permease family protein | 620.68  | 288.94  | -1.10 | 1.17E-26 |
| <b>VVMO6_04325</b>                                                              | Phospholipid-binding protein                               | 282.59  | 39.67   | -2.83 | 1.73E-48 |
| <b>VVMO6_04520</b>                                                              | Multimeric flavodoxin WrbA                                 | 15.05   | 6.39    | -1.24 | 2.32E-02 |
| <b>VVMO6_04524</b>                                                              | Acetyltransferase                                          | 43.92   | 20.73   | -1.08 | 1.02E-03 |
| <b>Signal transduction mechanisms<sup>c</sup></b>                               |                                                            |         |         |       |          |

|                                       |                                                                     |        |        |       |          |
|---------------------------------------|---------------------------------------------------------------------|--------|--------|-------|----------|
| <b>VVMO6_03870</b>                    | Putative two-component response regulatory protein                  | 579.57 | 129.13 | -2.17 | 2.77E-73 |
| <b>Defense mechanisms<sup>c</sup></b> |                                                                     |        |        |       |          |
| <b>VVMO6_00539</b>                    | ABC-type multidrug transport system                                 | 227.40 | 78.06  | -1.54 | 1.19E-21 |
| <b>VVMO6_03667</b>                    | Multidrug resistance protein A                                      | 178.81 | 72.97  | -1.29 | 1.47E-12 |
| <b>VVMO6_04387</b>                    | Membrane fusion component of tripartite multidrug resistance system | 15.39  | 7.15   | -1.11 | 3.76E-02 |
| <b>Function unknown<sup>c</sup></b>   |                                                                     |        |        |       |          |
| <b>VVMO6_00408</b>                    | Predicted transmembrane protein                                     | 40.21  | 18.84  | -1.09 | 8.44E-04 |
| <b>VVMO6_00453</b>                    | Hypothetical protein                                                | 559.71 | 247.17 | -1.18 | 5.74E-27 |
| <b>VVMO6_00887</b>                    | Hypothetical protein                                                | 108.91 | 50.59  | -1.11 | 1.3E-07  |
| <b>VVMO6_01713</b>                    | Hypothetical protein                                                | 9.35   | 2.78   | -1.75 | 3.05E-02 |
| <b>VVMO6_02105</b>                    | Membrane protein                                                    | 125.60 | 60.84  | -1.05 | 2.50E-07 |
| <b>VVMO6_03810</b>                    | Hypothetical protein                                                | 39.17  | 18.91  | -1.05 | 1.85E-03 |
| <b>VVMO6_04285</b>                    | Membrane protein                                                    | 14.34  | 5.21   | -1.46 | 1.24E-02 |
| <b>VVMO6_04437</b>                    | Membrane protein                                                    | 21.42  | 10.31  | -1.05 | 1.64E-02 |
| <b>Unclassified<sup>c</sup></b>       |                                                                     |        |        |       |          |
| <b>VVMO6_00939</b>                    | Hypothetical protein                                                | 824.70 | 317.42 | -1.38 | 2.46E-45 |
| <b>VVMO6_01196</b>                    | Hypothetical protein                                                | 167.49 | 58.27  | -1.52 | 3.90E-14 |
| <b>VVMO6_01874</b>                    | Hypothetical protein                                                | 236.18 | 99.02  | -1.25 | 2.31E-12 |
| <b>VVMO6_01899</b>                    | Hypothetical protein                                                | 18.43  | 8.85   | -1.06 | 4.03E-02 |
| <b>VVMO6_02992</b>                    | Permease of the major facilitator superfamily                       | 19.07  | 9.16   | -1.06 | 3.28E-02 |
| <b>VVMO6_03146</b>                    | Hypothetical protein in aerobactin uptake cluster                   | 25.32  | 11.93  | -1.09 | 9.13E-03 |
| <b>VVMO6_03548</b>                    | Pyruvate/2-oxoglutarate dehydrogenase                               | 15.93  | 7.18   | -1.15 | 3.15E-02 |

| complex dihydrolipoamide dehydrogenase component |                                               |         |         |       |          |
|--------------------------------------------------|-----------------------------------------------|---------|---------|-------|----------|
| <b>VVMO6_03986</b>                               | Hypothetical protein                          | 16.61   | 7.29    | -1.19 | 3.83E-02 |
| <b>VVMO6_04154</b>                               | Permease of the major facilitator superfamily | 40.51   | 19.02   | -1.09 | 1.48E-03 |
| <b>VVMO6_04217</b>                               | Hypothetical protein                          | 10.42   | 3.36    | -1.63 | 2.70E-02 |
| <b>VVMO6_04375</b>                               | Acyl-CoA synthetase                           | 175.34  | 82.71   | -1.08 | 1.09E-10 |
| <b>VVMO6_04432</b>                               | Hypothetical protein                          | 20.18   | 9.30    | -1.12 | 2.04E-02 |
| <b>VVMO6_04506</b>                               | Hypothetical protein                          | 9.45    | 2.88    | -1.71 | 2.55E-02 |
| <b>VVMO6_04521</b>                               | Hypothetical protein                          | 28.86   | 9.86    | -1.55 | 5.05E-04 |
| <b>Antiphagocytosis<sup>d</sup></b>              |                                               |         |         |       |          |
| <b>VVMO6_03346</b>                               | Capsular polysaccharide                       | 44.61   | 16.59   | -1.43 | 2.11E-05 |
| <b>VVMO6_03350</b>                               | Capsular polysaccharide                       | 149.86  | 52.07   | -1.53 | 1.36E-14 |
| <b>VVMO6_03351</b>                               | Capsular polysaccharide                       | 595.28  | 230.69  | -1.37 | 1.17E-26 |
| <b>Chemotaxis and motility<sup>d</sup></b>       |                                               |         |         |       |          |
| <b>VVMO6_02252</b>                               | Flagella                                      | 3175.42 | 1519.97 | -1.06 | 4.24E-54 |

<sup>a</sup> Locus tags are based on the database for the *V. vulnificus* MO6-24/O genome (GenBank accession numbers: CP002469 and CP002470, <https://www.ncbi.nlm.nih.gov/>).

<sup>b</sup>  $|\text{Log}_2 \text{fold change}| \geq 1.0$ , and  $P \text{ value} \leq 0.05$ .

<sup>c</sup> Clusters of orthologous genes (COG, <http://weizhong-lab.ucsd.edu/webMGA/>) category<sup>7</sup>.

<sup>d</sup> Virulence Factor Database (VFDB, <http://www.mgc.ac.cn/VFs/>) category<sup>8</sup>.



## Supplementary References

1. Wright, A. C., Simpson, L. M., Oliver, J. D. & Morris, J. G. Phenotypic evaluation of acapsular transposon mutants of *Vibrio vulnificus*. *Infect. Immun.* **58**, 1769–1773 (1990).
2. Lee, J. H. *et al.* Identification and characterization of the *Vibrio vulnificus* *rtxA* essential for cytotoxicity *in vitro* and virulence in mice. *J. Microbiol.* **45**, 146–52 (2007).
3. Lee, A. *et al.* *Vibrio vulnificus* RtxA is a major factor driving inflammatory T helper type 17 cell responses *in vitro* and *in vivo*. *Front. Immunol.* **9**, 1–11 (2018).
4. Simon, R., Priefer, U., & Puhler, A. A broad host range mobilization system for *in vivo* genetic engineering: transposon mutagenesis in Gram-negative bacteria. *BioTechnology* **1**, 784–7912 (1983).
5. Philippe, N., Alcaraz, J.-P., Coursange, E., Geiselmann, J. & Schneider, D. Improvement of pCVD442, a suicide plasmid for gene allele exchange in bacteria. *Plasmid* **51**, 246–255 (2004).
6. Lee, Y. *et al.* Makes caterpillars floppy-like effector-containing MARTX toxins require host ADP-ribosylation factor (ARF) proteins for systemic pathogenicity. *Proc. Natl. Acad. Sci. U. S. A.* **116**, 18031–18040 (2019).
7. Wu, S., Zhu, Z., Fu, L., Niu, B. & Li, W. WebMGA: A customizable web server for fast metagenomic sequence analysis. *BMC Genomics* **12**, (2011).
8. Liu, B., Zheng, D., Jin, Q., Chen, L. & Yang, J. VFDB 2019: A comparative pathogenomic platform with an interactive web interface. *Nucleic Acids Res.* **47**, D687–D692 (2019).
