# Supplementary material for: MARTX toxin of Vibrio vulnificus induces RBC phosphatidylserine exposure that can contribute to thrombosis
Source: PubMed Central journal article supplement (PMC9385741; doi:10.1038/s41467-022-32599-0), 2022-08-17
Supplement: 41467_2022_32599_MOESM2_ESM.pdf [file 41467_2022_32599_MOESM2_ESM.pdf]

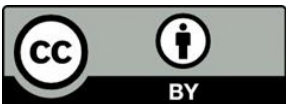

**Open Access** This file is licensed under a Creative Commons Attribution 4.0 International License, which permits use, sharing, adaptation, distribution and reproduction in any medium or format, as long as you give appropriate credit to the original author(s) and the source, provide a link to the Creative Commons license, and indicate if changes were made. In the cases where the authors are anonymous, such as is the case for the reports of anonymous peer reviewers, author attribution should be to 'Anonymous Referee' followed by a clear attribution to the source work. The images or other third party material in this file are included in the article's Creative Commons license, unless indicated otherwise in a credit line to the material. If material is not included in the article's Creative Commons license and your intended use is not permitted by statutory regulation or exceeds the permitted use, you will need to obtain permission directly from the copyright holder. To view a copy of this license, visit <http://creativecommons.org/licenses/by/4.0/>.

Reviewers' comments:

Reviewer #1 (Remarks to the Author):

Chung H Y et al in their manuscript titled "Vibrio vulnificus MARTX toxin induces thrombosis through the procoagulant activity of red blood cell" examine the effect of low multiplicity of infection [MOI] (1-10 cells) of *V. vulnificus* on human red blood cells (RBCs) in a highly controlled set of experiments. Their experiments revealed that upon exposure of *V. vulnificus* to RBCs, human blood cells induce a series of both intra- and extracellular chemicals, and compounds/molecules that together changes RBC's cell morphology from normal to echinocyte to spherocyte that becomes prone to thrombosis. This is an excellent study with all experiments done with carefully designed experiments. I have the following comments to the manuscript as follows:

1. I suggest that the authors change their current title to "Pore-forming domain of MARTX toxin of *Vibrio vulnificus* induces thrombosis through the procoagulant activity of red blood cells", as effector molecules of the toxin did not play any role(s) on RBCs' phenotypic changes and thrombosis.
2. The manuscript is very difficult to read and understand because of poor writing and composition; therefore, I suggest that the authors extensively revise the manuscript with particular emphasis on abstract and result sections. Many sentences for example in MATRIX toxin (result section) must be revised for clarity!
3. I assume that the authors indicated the expression of phosphatidyl serine (PS) rather than PS exposure in the entire manuscript including all figures; if I am correct, please change accordingly in the manuscript and in figure legends/axis.
4. Do the RBCs self-aggregation linked to PS, as PS promoted the spike like cell surface appendages on RBC? Can the authors use the same dye (annexin V) to illuminate PS in figure 2-i to test the idea I have raised?
5. If effector domain of MARTX does not have any role (as shown experimentally) in the manuscript, does pore-forming domain of the toxin elicits stress on RBCs to render them to spherocyte as reported by mechanical and chemical stressors (should be discussed with references in discussion and result sections)
6. In addition to PS, do extracellular MVs contain other chemicals such as iron and/or any other material that might be of interest to *V. vulnificus*' growth and/or signaling purposes?
7. Humans, particularly immunocompromised patients (liver cirrhosis, diabetes mellitus, cancer), are incidental host of *V. vulnificus*. Given that what is the overall impact of this study in terms of deformed RBCs. Even If human body find such deformed RBCs, isn't that our immune system would remove them? If so, sub-optimal level of infection may not render the infected person to be anemic? Please discuss in the "discussion section"

8. Alternatively, deformed RBCs might go apoptosis to help the affected host from not being anemic?  
Discuss in your discussion

Reviewer #2 (Remarks to the Author):

The article by Chung et al present important findings regarding the pathogenesis of the poorly understood pathogen *Vibrio vulnificus*. *V. vulnificus* is a deadly pathogen that can cause a deadly septicemia characterized by circulatory disorders such as venous thrombosis. To date, the molecular mechanisms controlling this phenomenon remain poorly understood. This study aims to understand some of the factors associated with this phenotype.

The study is well designed and systematic. Limited attention has been spent regarding the grammar and narrative of the article (even the first two sentences of the abstract end the same way). Furthermore, the findings are exclusively descriptive and corroborate those found in other pathogens. It would be of interest if the authors were more explicit about the broader relevance of their findings.

Reviewer #3 (Remarks to the Author):

Infection by *Vibrio vulnificus* can lead to life threatening sepsis and related pathological effects such as venous thrombosis. The mechanism by which *V. vulnificus* causes thrombosis had not previously been elucidated and it is the subject of this study. It is known that venous thrombosis can result from increased procoagulant function by red blood cells (RBCs) and that other markers such as elevation of intracellular calcium, caspase-3 and scramblase activities can all occur in response to certain stressors. Additional associated changes of the RBCs include externalization of phosphatidylserine (PS), which increases prothrombotic activity, shedding of PS-bearing microvesicles (MVs) and morphotype switching from the normal discocyte to an echinocyte and then a spherocyte form. Here, the authors present evidence that exposure of RBCs to sub-hemolytic numbers of *V. vulnificus* results in the indicated morphotype changes, production of MVs as well as PS externalization, and procoagulant and prothrombotic activities (Figs. 1 and 2). They then used transcriptome sequencing to identify *V. vulnificus* genes differentially expressed in response to exposure to RBCs. Only one exotoxin gene (*rtxA*), which encodes MARTX toxin, was upregulated. Previous studies have shown that MARTX toxin is the most important exotoxin for pathogenesis of *V. vulnificus*. They then found that an *rtxA* deletion strain showed significantly lower induction of procoagulant activities of RBCs (PS externalization, MV production, other markers) (Fig. 3). They also present evidence that a modified MARTX toxin minus its

effector domains but still containing its pore-forming domains (EF-rtxA) still induces procoagulant activities in RBCs (also Fig. 3). Finally, the authors found that wild type *V. vulnificus* but not an rtxA deletion mutant caused venous thrombosis in vivo in rats. The authors concluded that the MARTX toxin (and specifically its pore-forming ability) is the molecule responsible for inducing thrombosis during *V. vulnificus* infection. Overall, this is a substantial result since it relates an important pathological feature of *V. vulnificus* infection to a specific virulence determinant produced by the bacterium.

#### Additional comments

1. Line 70- rtxA is mentioned here for the first time without any introduction. It should be stated more clearly that it is the structural gene for the MARTX toxin.

2. Fig 1C- the TEM is not particularly informative. There are red arrowheads pointing to some cells that are *V. vulnificus* but other cells of similar size apparently aren't. But how can we really tell? The SEM and confocal images are much more definitive. Why not delete the TEM or at least put it in supplemental info?

3. Results on lines 150-160. The authors begin using a rtxA deletion mutant to study the role of MARTX toxin in inducing procoagulant/thrombin effects on RBCs in vitro (Fig. 3) and in vivo in rats (Fig. 4). The comparison is the WT strain versus the rtxA deletion mutant. According to supplemental table1, the rtxA gene appears to have been replaced by a resistance gene in this mutant. The authors do not include the results of a complemented mutant in any of their data in these figures. However, they mention in this section that an insertional mutant of rtxA was attenuated (similar to the rtxA deletion mutant) in inducing procoagulant activities in RBCs and the data is in supplemental Fig. 2. Also, the revertant of the insertion mutant was restored to WT for its ability to induce procoagulant activities (also in supplemental Fig. 2). But these address only the vitro results. The demonstration of a lack of thrombosis in rats by the rtxA deletion mutant (Fig. 4) is a critically important piece of this study. As such, at a minimum, either the complemented rtxA deletion mutant should be included in the in vivo experiment or, alternatively, the WT, the insertion mutant and its revertant should be compared.

4. Lines 169-170- please include reference(s) where it was shown that pore forming ability of MARTX toxin or its derivatives is indicated by bleb formation.

5. Discussion section- given the overall impact of the results of this study, the discussion section is rather thin and includes a lot of restating of the results (e.g., most of the third paragraph). In that paragraph, the authors mention that its interesting that the rtxA gene is upregulated following exposure of *V. vulnificus* to RBCs. I agree that its interesting, but can the authors give any more insight/speculation as to the possible mechanism of this induction? What is known about regulation of rtxA gene expression

and could this induction help explain previous evidence which showed that MARTX (RTX) toxin displays contact-mediated cytotoxicity (e.g., Kim et al, 2008)?

Reviewer #4 (Remarks to the Author):

This study shows that MARTX toxin from *Vibrio vulnificus* increase phosphatidylserine (PS) exposure on RBC and the release of extracellular vesicles. Most of the studies are in vitro. In the rat model thrombosis is triggered by tissue factor.

Major comments

1/ An increase in levels of PS-positive RBCs and extracellular vesicles will enhance ongoing coagulation but is not sufficient to trigger coagulation. Therefore, the story is incomplete.

2/ With the exception of sepsis, there is little data supporting the idea that *Vibrio vulnificus* triggers coagulation.

3/ MARTX toxin similar to listeriolysin and alpha hemolysin toxin are designed to lyse RBC. The pathophysiological significance of studying sub-hemolytic doses of MARTX is questionable.

4/ *Vibrio vulnificus* express metalloproteases that activate prothrombin to thrombin. In addition, these proteases cleave fibrinogen but this does not form a clot. Since this is a Gram-negative bacteria it is likely that like *E. coli* and other Gram-negative bacteria the mechanism of activation of coagulation is due to induction of tissue factor expression on monocytes.

5/ The rat studies show enhanced venous thrombosis. This model requires tissue factor as a trigger. What is not shown are levels of circulating PS-positive extracellular vesicles. A model of disseminated intravascular coagulation would be a better model rather than venous thrombosis.

1 **Reviewer’s Comments by Reviewer #1.**

2 **General comment:**

3 Chung H Y et al in their manuscript titled “*Vibrio vulnificus* MARTX toxin induces thrombosis  
4 through the procoagulant activity of red blood cell” examine the effect of low multiplicity of  
5 infection [MOI] (1-10 cells) of *V. vulnificus* on human red blood cells (RBCs) in a highly  
6 controlled set of experiments. Their experiments revealed that upon exposure of *V. vulnificus* to  
7 RBCs, human blood cells induce a series of both intra- and extracellular chemicals, and  
8 compounds/molecules that together changes RBC’s cell morphology from normal to  
9 echinocyte to spherocyte that becomes prone to thrombosis. This is an excellent study with all  
10 experiments done with carefully designed experiments. I have the following comments to the  
11 manuscript as follows:

12

13 **Comment #1:** I suggest that the authors change their current title to “**Pore-forming  
14 domain of MARTX toxin of *Vibrio vulnificus* induces thrombosis through the  
15 procoagulant activity of red blood cells**”, as effector molecules of the toxin did not play  
16 any role(s) on RBCs’ phenotypic changes and thrombosis.

17 **Response:** We really appreciate the reviewer’s kind suggestion to change the title which is  
18 more relevant to our work. We modified the title as the reviewer suggested.

19 **(Original)** *Vibrio vulnificus* MARTX toxin induces thrombosis through the procoagulant  
20 activity of red blood cell

21 **(Revised)** Pore-forming activity of the MARTX toxin of *Vibrio vulnificus* induces  
22 thrombosis through the procoagulant activity of red blood cells

23

24 **Comment #2:** The manuscript is very difficult to read and understand because of poor  
25 writing and composition; therefore, I suggest that the authors extensively revise the  
26 manuscript with particular emphasis on abstract and result sections. Many sentences for  
27 example in MARTX toxin (result section) must be revised for clarity!

28 **Response:** We have modified the abstract to emphasize the significance of our work. Also  
29 we have clearly stated not to confuse *rtxA* gene with MARTX toxin in results section. The  
30 final text was completely checked by a professional native speaker.

31 **(Original Abstract)**

32 The human pathogen *Vibrio vulnificus* is often characterized by hemolysis and circulatory  
33 disorders such as venous thrombosis. However, little is known about the molecular  
34 mechanism and responsible virulence factor(s) of *V. vulnificus* for venous  
35 thrombosis. Herein, *V. vulnificus* infection at the sub-hemolytic level induced shape change  
36 of human red blood cells (RBCs) into echinocytes, followed by spherocytes. Also, *V.*  
37 *vulnificus* induced procoagulant activity of RBCs, leading to phosphatidylserine exposure,

38 and microvesicle generation and ultimately, prothrombotic activity. Furthermore, the  
39 exposure of *V. vulnificus* to RBCs substantially increased the *rtxA* expression, and the pore-  
40 forming activity of the multifunctional autoprocessing repeats-in-toxin (MARTX) toxin  
41 promoted the elevation of the intracellular  $Ca^{2+}$  [ $Ca^{2+}$ ]<sub>i</sub> level. Most importantly, the MARTX  
42 toxin was essential for thrombin generation *ex vivo* and thrombus formation of RBCs in the  
43 rat *in vivo*. Collectively, we demonstrated that the *V. vulnificus* MARTX toxin may induce  
44 thrombosis through the cytopathic changes of RBCs in the infected patients.

45 **(Revised Abstract)**

46 *V. vulnificus*-infected patients suffer from hemolytic anemia and circulatory lesions, often  
47 accompanied by venous thrombosis. However, the pathophysiology of venous thrombosis  
48 associated with *V. vulnificus* infection remains largely unknown. Herein, *V. vulnificus*  
49 infection at the sub-hemolytic level induced shape change of human red blood cells (RBCs)  
50 accompanied by phosphatidylserine exposure, and microvesicle generation, leading to the  
51 procoagulant activation of RBCs and ultimately, acquisition of prothrombotic activity. Of  
52 note, *V. vulnificus* exposed to RBCs substantially upregulated the *rtxA* gene encoding  
53 multifunctional autoprocessing repeats-in-toxin (MARTX) toxin. Mutant studies showed  
54 that *V. vulnificus*-induced RBC procoagulant activity was due to the pore forming region of  
55 the MARTX toxin causing intracellular  $Ca^{2+}$  influx in RBCs. In a rat venous thrombosis  
56 model, the *V. vulnificus* wild type increased thrombosis while the *ΔrtxA* mutant failed to  
57 increase thrombosis, confirming that *V. vulnificus* induces thrombosis through the  
58 procoagulant activation of RBCs via the mediation of the MARTX toxin.

59

60 **Comment #3: I assume that the authors indicated the expression of phosphatidyl serine**  
61 **(PS) rather than PS exposure in the entire manuscript including all figures; if I am correct,**  
62 **please change accordingly in the manuscript and in figure legends/axis.**

63 **Response:** If cellular protein levels were changed, it is usually called the decrease or  
64 increase of its expression. Since PS is an anionic phospholipid mainly localized on the inner  
65 leaflet of cell membranes, it is more relevant to be called 'PS exposure', meaning  
66 externalization of PS from inner membrane into outer membrane. Most references selected  
67 the terms 'PS exposure' or 'PS externalization' rather than 'PS expression' (Nagata S, et al.  
68 [Curr Opin Immunol. 2020 62:31-38](#)).

69

70 **Comment #4: Do the RBCs self-aggregation linked to PS, as PS promoted the spike like**  
71 **cell surface appendages on RBC? Can the authors use the same dye (annexin V) to**  
72 **illuminate PS in figure 2-i to test the idea I have raised?**

73 **Response:** It is very interesting question, but it is not feasible to observe RBCs self-  
74 aggregation using the dye (Annexin V-FITC) which was applied to detect the increased PS  
75 exposure on the surface of RBC membranes (Fig. 2b). Since Annexin V is a specific PS-  
76 binding protein (Yen TC, et al. [Anal. Biochem. 2010 406\(1\):70-79](#)), addition of annexin V  
77 would cover the exposed PS and affect RBC self-aggregation. Thus, RBCs were directly  
78 stained with a general dye, anti-glycophorin-A-PE to visualize RBC self-aggregation (Fig.  
79 2i).

80

81 **Comments #5: If effector domain of MARTX does not have any role (as shown**  
82 **experimentally) in the manuscript, does pore-forming domain of the toxin elicits stress**  
83 **on RBCs to render them to spherocyte as reported by mechanical and chemical stressors**  
84 **(should be discussed with references in discussion and result sections)**

85 **Response:** As the reviewer suggested, we have added some information in the 3rd paragraph  
86 of Discussion section describing the possible role of pore-forming regions related to  
87 echinocyte formation with a couple of references.

88 **(Original, the 3rd paragraph in Discussion section)**

89 Subsequently, mutational analysis demonstrated that the MARTX toxin was responsible for  
90 the elevation of the  $[Ca^{2+}]_i$  level leading to the procoagulant activity of RBCs with thrombin  
91 generation (Fig. 3b-f). Notably, further functional dissection analysis revealed that the pore-  
92 forming activity of the EF-MARTX toxin, not the multiple cytotoxic or cytopathic effector  
93 functions, is attributed to the elevation of the  $[Ca^{2+}]_i$  level, which triggers PS exposure and  
94 thrombin generation of RBCs (Fig. 3g-j).

95 **(Revised, the 3rd paragraph in Discussion section)**

96 Mutational analysis revealed that the MARTX toxin was responsible for the elevation of the  
97  $[Ca^{2+}]_i$  level leading to the procoagulant activity of RBCs and thrombin generation (Fig. 3b-  
98 f). Notably, further functional dissection analysis revealed that the pore-forming activity of  
99 the EF-MARTX toxin, but not the multiple cytotoxic or cytopathic effector functions, is  
100 attributed to the elevation of the  $[Ca^{2+}]_i$  level, which triggers PS exposure of RBCs and  
101 thrombin generation (Fig. 3g-j). Previous studies reported that the exposure of RBCs to  
102 exogenous and endogenous stimuli like calcium ionophore A23187 and lysophosphatidic  
103 acid (LPA) induces morphological change from discocyte into echinocytes mediated  
104 through the elevation of  $[Ca^{2+}]_i$  level (Anderson RA, et al. *Nature*, 1981 **292**(5819):158-161;  
105 Chung SM, et al. *Arterioscler Thromb Vasc Biol*. 2007 **27**(2):414-421). These results  
106 suggest that the pore-forming activity of the EF-MARTX toxin may be responsible for the  
107 morphological change of RBCs from normal discocyte into pathologic echinocyte through  
108 the elevation of the  $[Ca^{2+}]_i$  level.

109

110 **Comments #6: In addition to PS, do extracellular MVs contain other chemicals such as**  
111 **iron and/or any other material that might be of interest to *V. vulnificus*' growth and/or**  
112 **signaling purposes?**

113 **Response:** Reviewer indicated a very important hypothesis on the possible role of MVs  
114 formed by *V. vulnificus*-infected RBCs. Recent reports suggest that MVs derived from RBCs  
115 retain residual hemoglobins and metabolic proteins (Chiangjong W, et al. *Front Med*. 2021  
116 **8**:761362) and that iron may play a key role in the pathogenicity of *V. vulnificus* (Wen Y, et  
117 al. *J Biol Chem*. 2016 **291**(27):14213-14230). As shown in supplementary table 2, *V.*  
118 *vulnificus* infection of RBCs significantly upregulated several genes of *V. vulnificus* related  
119 to iron uptake, suggesting that increased availability of iron from numerous MVs may  
120 promote the growth and survival of *V. vulnificus*.



121 We have added a new discussion paragraph with a couple of references right after the 4th  
122 paragraph of Discussion section as follows.

123 **(Revised, new addition in Line 242)**

124 In addition to the *rtxA* gene, several genes related to iron uptake (Supplementary Table 2)  
125 were also significantly upregulated in *V. vulnificus* exposed to RBCs, along with the  
126 generation of numerous MVs. Recent reports suggest that MVs derived from RBCs retain  
127 residual hemoglobin as an important resource of iron (Chiangiong W, et al. *Front Med.* 2021  
128 **8:761362**). Incidentally, iron is essential for the growth and lethality by *V. vulnificus* (Wen  
129 Y, et al. *J Biol Chem.* 2016 **291(27):14213-14230**). Our results on the upregulation of iron-  
130 uptake related genes of *V. vulnificus* combined with the numerous MVs generation from *V.*  
131 *vulnificus*-infected RBCs imply that increased availability of iron from the MVs may  
132 promote the growth and lethality of *V. vulnificus*, which may be crucial to the manifestation  
133 of its pathogenicity.

134

135 **Comments #7: Humans, particularly immunocompromised patients (liver cirrhosis,**  
136 **diabetes mellitus, cancer), are incidental host of *V. vulnificus*. Given that what is the**  
137 **overall impact of this study in terms of deformed RBCs. Even If human body find such**  
138 **deformed RBCs, isn't that our immune system would remove them? If so, sub-optimal**  
139 **level of infection may not render the infected person to be anemic? Please discuss in the**  
140 **“discussion section”**

141 **Response:** Prior to answer comment #7 and #8, we would like to clarify the terminology  
142 ‘deformed RBCs’. Normal RBCs in human are continuously deformed when they pass  
143 through a narrow capillary, helping effective O<sub>2</sub> transport. The echinocytes, and spherocytes  
144 induced by pathogen stimuli in our study would be better called RBC abnormality, since the  
145 ability of O<sub>2</sub> transport was significantly decreased in these abnormal forms of RBCs (Jung  
146 F, et al. *Clin Hemorheol Microcirc.* 2008 **38:1-11**). Our results show that this RBC  
147 abnormality along with PS exposure and MV generation induced procoagulant activity,  
148 ultimately leading to thrombosis.

149 As the reviewer suggests, it has been well known that the immunocompromised patients  
150 (liver cirrhosis, diabetes mellitus, and cancer) have an increased risk of thrombosis and  
151 cardiovascular diseases. There is, however, no epidemiological study available on the risk  
152 of thrombosis in *V vulnificus* infected immunocompromised patients.

153 Regarding the reviewer’s question on the removal of abnormal RBCs, the abnormal RBCs  
154 exposing PS on the surface of membrane could exhibit the dual effect; procoagulant activity  
155 and erythrophagocytosis (taken up by the spleen) (Klei TR, et al. *Front Immunol.* 2017 **8:**  
156 **73**). The controlling mechanism of procoagulant activity vs erythrophagocytosis is currently  
157 unknown. However, since pathogen infection is quite a rapid response inducing PS exposure  
158 and MV generation within an hour, we think the procoagulant pathway would be  
159 predominant compared to erythrophagocytosis.

160 At this moment, due to a lack of experiment on procoagulant activity using *in vitro* cell  
161 system simulating immunocompromised patients, no report on an increased risk by

162 epidemiological study, and absence of mechanistic support for rapid vs slow responses, we  
163 are reluctant to discuss this part, which may require too much speculation. We hope the  
164 reviewer will agree with our view.

165

166 **Comments #8: Alternatively, deformed RBCs might go apoptosis to help the affected host**  
167 **from not being anemic? Discuss in your discussion**

168 **Response:** This question may be answered in part in the response to Comments #7. The *V.*  
169 *vulnificus* infection of RBCs was a rapid process while apoptosis is a somewhat delayed and  
170 latent response. At sub-hemolytic concentrations of *V. vulnificus*, the infection of RBCs  
171 rapidly induced attachment of RBCs to endothelial cells or aggregation of RBCs (Fig. 2h,  
172 i), resulting in the decreased number of intact RBCs. Also at high concentrations, *V.*  
173 *vulnificus* caused rapid morphological changes, finally leading to hemolysis (Fig. 5). In both  
174 cases, the deformed RBCs may rapidly cause anemia in the affected host depending upon  
175 time or severity of infection.

176 **Reviewer's Comments by Reviewer #2**

177 **General comment:**

178 The article by Chung et al present important findings regarding the pathogenesis of the poorly  
179 understood pathogen *Vibrio vulnificus*. *V. vulnificus* is a deadly pathogen that can cause a  
180 deadly septicemia characterized by circulatory disorders such as venous thrombosis. To date,  
181 the molecular mechanisms controlling this phenomenon remain poorly understood. This study  
182 aims to understand some of the factors associated with this phenotype.

183 The study is well designed and systematic. Limited attention has been spent regarding the  
184 grammar and narrative of the article (even the first two sentences of the abstract end the same  
185 way). Furthermore, the findings are exclusively descriptive and corroborate those found in  
186 other pathogens. It would be of interest if the authors were more explicit about the broader  
187 relevance of their findings.

188 **Response #1:** Thank you for your favorable response on our work. We have modified the  
189 abstract especially the first two sentences and the last sentence to increase the clarity of our  
190 work. The final text was completely checked by a professional native speaker.

191 **(Original Abstract)**

192 The human pathogen *Vibrio vulnificus* is often characterized by hemolysis and circulatory  
193 disorders such as venous thrombosis. However, little is known about the molecular  
194 mechanism and responsible virulence factor(s) of *V. vulnificus* for venous  
195 thrombosis. Herein, *V. vulnificus* infection at the sub-hemolytic level induced shape change  
196 of human red blood cells (RBCs) into echinocytes, followed by spherocytes. Also, *V.*  
197 *vulnificus* induced procoagulant activity of RBCs, leading to phosphatidylserine exposure,  
198 and microvesicle generation and ultimately, prothrombotic activity. Furthermore, the  
199 exposure of *V. vulnificus* to RBCs substantially increased the *rtxA* expression, and the pore-  
200 forming activity of the multifunctional autoprocessing repeats-in-toxin (MARTX) toxin  
201 promoted the elevation of the intracellular Ca<sup>2+</sup> level. Most importantly, the MARTX toxin  
202 was essential for thrombin generation *ex vivo* and thrombus formation of RBCs in the rat *in*  
203 *vivo*. Collectively, we demonstrated that the *V. vulnificus* MARTX toxin may induce  
204 thrombosis through the cytopathic changes of RBCs in the infected patients.

205 **(Revised Abstract)**

206 *V. vulnificus*-infected patients suffer from hemolytic anemia and circulatory lesions, often  
207 accompanied by venous thrombosis. However, the pathophysiology of venous thrombosis  
208 associated with *V. vulnificus* infection remains largely unknown. Herein, *V. vulnificus*  
209 infection at the sub-hemolytic level induced shape change of human red blood cells (RBCs)  
210 accompanied by phosphatidylserine exposure, and microvesicle generation, leading to the  
211 procoagulant activation of RBCs and ultimately, acquisition of prothrombotic activity. Of  
212 note, *V. vulnificus* exposed to RBCs substantially upregulated the *rtxA* gene encoding  
213 multifunctional autoprocessing repeats-in-toxin (MARTX) toxin. Mutant studies showed  
214 that *V. vulnificus*-induced RBC procoagulant activity was due to the pore forming region of  
215 the MARTX toxin causing intracellular Ca<sup>2+</sup> influx in RBCs. In a rat venous thrombosis  
216 model, the *V. vulnificus* wild type increased thrombosis while the *ΔrtxA* mutant failed to

217 increase thrombosis, confirming that *V. vulnificus* induces thrombosis through the  
218 procoagulant activation of RBCs via the mediation of the MARTX toxin.

219

220 **Response #2:** Regarding the comment that our findings may be an isolated event which  
221 cannot be extended to other pathogens, it has been reported that many pathogens such as *E.*  
222 *coli* and *Salmonella* also cause thrombosis (Farstad H, et al. *Acta paediatrica*. 2003  
223 **92(2):254-257**; Pineda MC, et al. *Neurologist*. 2012 **18(4):202-203**). However, they didn't  
224 provide molecular mechanisms for the pathogens to cause the thrombosis. Therefore, we  
225 can suggest that the increased procoagulant activity accompanied by calcium influx into  
226 RBCs can explain the thrombosis caused by other pathogens such as *E. coli* and *Salmonella*  
227 in addition to *Vibrio* spp. carrying *rtxA* homologues. In order to extend our findings to other  
228 pathogens, we are currently investigating whether other pathogens may induce the  
229 procoagulant activity of RBCs and what type of toxin is responsible for the thrombotic  
230 events observed in human patients. We would like to report the further results with other  
231 pathogens as another independent paper in near future.

232 **Reviewer's Comments by Reviewer #3**

233 **General comment:**

234 Infection by *Vibrio vulnificus* can lead to life threatening sepsis and related pathological effects  
235 such as venous thrombosis. The mechanism by which *V. vulnificus* causes thrombosis had not  
236 previously been elucidated and it is the subject of this study. It is known that venous thrombosis  
237 can result from increased procoagulant function by red blood cells (RBCs) and that other  
238 markers such as elevation of intracellular calcium, caspase-3 and scramblase activities can all  
239 occur in response to certain stressors. Additional associated changes of the RBCs include  
240 externalization of phosphatidylserine (PS), which increases prothrombotic activity, shedding of  
241 PS-bearing microvesicles (MVs) and morphotype switching from the normal discocyte to an  
242 echinocyte and then a spherocyte form. Here, the authors present evidence that exposure of  
243 RBCs to sub-hemolytic numbers of *V. vulnificus* results in the indicated morphotype changes,  
244 production of MVs as well as PS externalization, and procoagulant and prothrombotic activities  
245 (Figs. 1 and 2). They then used transcriptome sequencing to identify *V. vulnificus* genes  
246 differentially expressed in response to exposure to RBCs. Only one exotoxin gene (*rtxA*), which  
247 encodes MARTX toxin, was upregulated. Previous studies have shown that MARTX toxin is  
248 the most important exotoxin for pathogenesis of *V. vulnificus*. They then found that an *rtxA*  
249 deletion strain showed significantly lower induction of procoagulant activities of RBCs (PS  
250 externalization, MV production, other markers) (Fig. 3). They also present evidence that a  
251 modified MARTX toxin minus its effector domains but still containing its pore-forming  
252 domains (EF-*rtxA*) still induces procoagulant activities in RBCs (also Fig. 3). Finally, the  
253 authors found that wild type *V. vulnificus* but not an *rtxA* deletion mutant caused venous  
254 thrombosis *in vivo* in rats. The authors concluded that the MARTX toxin (and specifically its  
255 pore-forming ability) is the molecule responsible for inducing thrombosis during *V. vulnificus*  
256 infection. Overall, this is a substantial result since it relates an important pathological feature  
257 of *V. vulnificus* infection to a specific virulence determinant produced by the bacterium.

258

259 **Comments #1: Line 70- *rtxA* is mentioned here for the first time without any introduction.**  
260 **It should be stated more clearly that it is the structural gene for the MARTX toxin.**

261 **Response:** Thank you for your kind notification. In order to clarify the *rtxA*, we have revised  
262 line 57 in introduction section as follows.

263 **(Original, Line 57)** Among multiple virulence factors of *V. vulnificus*, the multifunctional  
264 autoprocessing repeats-in-toxin (MARTX) toxin is the most crucial exotoxin responsible for  
265 the pathogenicity of *V. vulnificus*<sup>14,15</sup>.

266 **(Revised, Line 58)** Among multiple virulence factors of *V. vulnificus*, the multifunctional  
267 autoprocessing repeats-in-toxin (MARTX) toxin, which is encoded by the *rtxA* gene, is the  
268 most crucial exotoxin responsible for the pathogenicity of *V. vulnificus*<sup>14,15</sup>.

269

270 **Comments #2:** Fig 1C- the TEM is not particularly informative. There are red  
271 arrowheads pointing to some cells that are *V. vulnificus* but other cells of similar size  
272 apparently aren't. But how can we really tell? The SEM and confocal images are much  
273 more definitive. Why not delete the TEM or at least put it in supplemental info?

274 **Response:** We are in agreement with the reviewer's opinion. We will move the TEM data  
275 from Fig. 1 into Supplementary Fig. 2, since some readers might be interesting to look up  
276 the TEM data to compare the images from SEM or Confocal microscopy.

277

278 **Comments #3:** Results on lines 150-160. The authors begin using a *rtxA* deletion mutant  
279 to study the role of MARTX toxin in inducing procoagulant/thrombin effects on RBCs in  
280 vitro (Fig. 3) and *in vivo* in rats (Fig. 4). The comparison is the WT strain versus the *rtxA*  
281 deletion mutant. According to supplemental table1, the *rtxA* gene appears to have been  
282 replaced by a resistance gene in this mutant. The authors do not include the results of a  
283 complemented mutant in any of their data in these figures. However, they mention in this  
284 section that an insertional mutant of *rtxA* was attenuated (similar to the *rtxA* deletion  
285 mutant) in inducing procoagulant activities in RBCs and the data is in supplemental Fig.  
286 2. Also, the revertant of the insertion mutant was restored to WT for its ability to induce  
287 procoagulant activities (also in supplemental Fig. 2). But these address only the *vitro*  
288 results. The demonstration of a lack of thrombosis in rats by the *rtxA* deletion mutant  
289 (Fig. 4) is a critically important piece of this study. As such, at a minimum, either the  
290 complemented *rtxA* deletion mutant should be included in the *in vivo* experiment or,  
291 alternatively, the WT, the insertion mutant and its revertant should be compared.

292 **Response:** We appreciate the reviewer's comment which is very critical to strengthen our  
293 manuscript. As reviewer #3 suggested, we did an additional experiment with a revertant of  
294 the *rtxA* deletion mutant to compare *V. vulnificus* wild type and *rtxA* deletion mutant to rule  
295 out other artefacts for *in vitro* and *in vivo* experiments.

296 As shown in Fig. 4e, f below, the reversion of the *rtxA* deletion mutant restored the ability  
297 of *V. vulnificus* to increase thrombogenesis along with procoagulant activities of RBCs, as  
298 consistently with *in vitro* data (Supplementary Fig. 3b, c). These results strongly support our  
299 conclusion that MARTX toxin of *V. vulnificus* is mainly responsible for the procoagulant  
300 activity of RBCs and thrombus formation *in vivo*.

301 We have replaced the original Fig. 4e, f with the new one and revised the last paragraph of  
302 results section, accordingly.

303 (Original Fig. 4e, f)

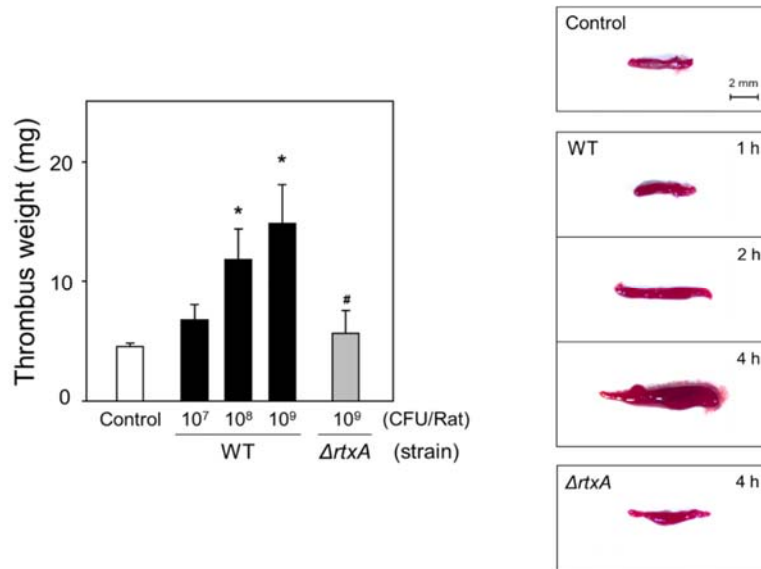

304

305 (Revised Fig. 4e, f)

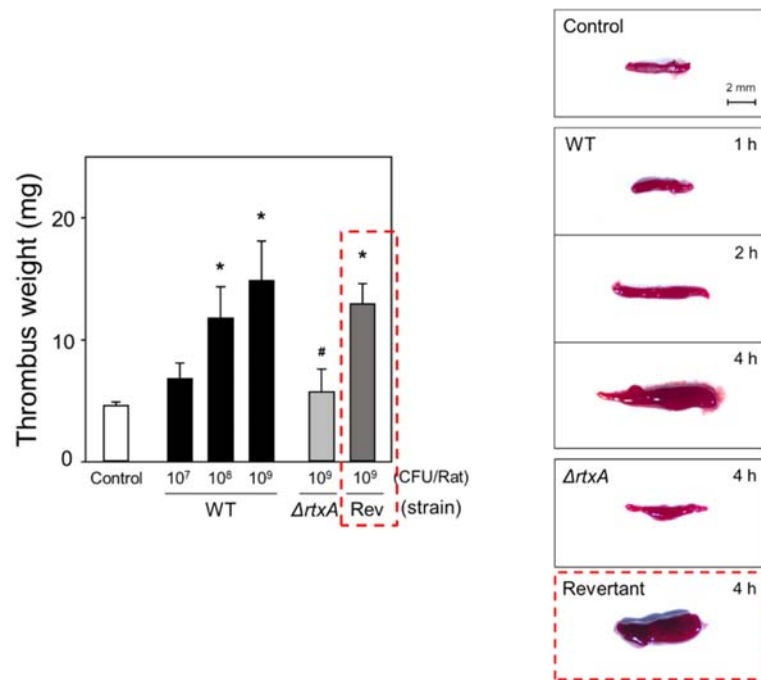

306

307

308 (Original, the last paragraph of Results section)

309 Finally, effects of *V. vulnificus* infection on thrombus formation *in vivo* were examined using  
310 a rat venous thrombosis model (Fig. 4d). When rats were IV infected with the *V. vulnificus*  
311 WT, and then injected with the thromboplastin, thrombus formation increased in an

312 incubation time-, and an infectious dose-dependent manner (Fig. 4e, f). In contrast, rats  
313 infected with *ΔrtxA* mutant did not show any significant increase in thrombus formation  
314 when compared with the uninfected control, indicating that the MARTX toxin is essential  
315 for the thrombosis *in vivo* induced by *V. vulnificus* infection.

316 **(Revised, the last paragraph of Results section)**

317 Finally, effects of *V. vulnificus* infection on thrombus formation were examined *in vivo* using  
318 a rat venous thrombosis model (Fig. 4d). When rats were infected with the *V. vulnificus* WT  
319 through IV, and then injected with the thromboplastin, thrombus formation increased in an  
320 incubation time-, and an infectious dose-dependent manner (Fig. 4e, f). In contrast, rats  
321 infected with the *ΔrtxA* mutant did not show any significant increase in thrombus formation  
322 when compared with the uninfected control. Furthermore, the revertant of the *ΔrtxA* mutant  
323 rescued the ability of *V. vulnificus* to increase thrombus formation, as consistent with *in vitro*  
324 data (Supplementary Fig. 3b, c). These results support our conclusion that the MARTX toxin  
325 of *V. vulnificus* is mainly responsible for the procoagulant activity of RBCs and thrombus  
326 formation *in vivo*.

327

328 **Comments #4: Lines 169-170- please include reference(s) where it was shown that pore**  
329 **forming ability of MARTX toxin or its derivatives is indicated by bleb formation.**

330 **Response:** Thank you for your kind suggestion. We will include a reference investigating  
331 pore forming ability of MARTX toxin related to bleb formation in line 171. (Cho C, et al. *J*  
332 *Microbiol.* 2022 **60**(2):224-233)

333

334 **Comments #5: Discussion section- given the overall impact of the results of this study, the**  
335 **discussion section is rather thin and includes a lot of restating of the results (e.g., most of**  
336 **the third paragraph). In that paragraph, the authors mention that its interesting that the**  
337 ***rtxA* gene is upregulated following exposure of *V. vulnificus* to RBCs. I agree that its**  
338 **interesting, but can the authors give any more insight/speculation as to the possible**  
339 **mechanism of this induction? What is known about regulation of *rtxA* gene expression**  
340 **and could this induction help explain previous evidence which showed that MARTX**  
341 **(RTX) toxin displays contact-mediated cytotoxicity (e.g., Kim et al, 2008)?**

342 **Response:** As the reviewer suggested, we have augmented the 3rd paragraph of discussion  
343 section emphasizing the mechanism of *rtxA* gene expression and its significance in RBCs  
344 thrombosis following *V. vulnificus* infection. We have included several additional citations  
345 to support our view.

346 **(Revised, new addition in Line 234)**

347 It has been previously reported that HlyU, a transcription regulator, upregulates the *rtxA*  
348 encoding MARTX toxin by directly binding to its promoter (Lee ZW, et al. *mBio.* 2020  
349 **11**(4):e00723-00720). Interestingly, this study revealed that the expression of *rtxA* was  
350 significantly increased following the exposure of *V. vulnificus* to RBCs (Fig. 3a,



351 Supplementary Table 2), supporting the previous report that direct contact of *V. vulnificus* to  
352 host cells is required to display MARTX cytotoxicity (Kim YR, et al. *Cell Microbiol.* 2008  
353 10(4):848–862). However, transcriptomic analysis showed that unlike *rtxA*, *hlyU* encoding  
354 HlyU was not upregulated in *V. vulnificus* infecting RBCs (Supplementary Table 2),  
355 indicating that other mechanism(s), yet unknown, could be involved in the upregulation of  
356 *rtxA* following exposure of *V. vulnificus* to RBCs.

357 **Reviewer's Comments by Reviewer #4**

358 **General comments:**

359 This study shows that MARTX toxin from *Vibrio vulnificus* increase phosphatidylserine (PS)  
360 exposure on RBCs and the release of extracellular vesicles. Most of the studies are *in vitro*. In  
361 the rat model thrombosis is triggered by tissue factor.

362 **Response to general comments:** In order to resolve the reviewer #4 concern, we have  
363 performed several experiments to support our views and answered the questions on a  
364 point-by-point basis. Furthermore, one paragraph of discussion section was incorporated  
365 to augment the significance of our work.

366

367 **Major comments**

368 **Comments #1: An increase in levels of PS-positive RBCs and extracellular vesicles will**  
369 **enhance ongoing coagulation but is not sufficient to trigger coagulation. Therefore, the**  
370 **story is incomplete.**

371 **Response:** The reviewer #4 questioned the pivotal role of PS-exposure of RBCs and RBCs-  
372 shed extracellular vesicles in initiating blood coagulation.

373 It has been well-established that PS-exposing RBCs and extracellular microvesicles actively  
374 and majorly participate in the coagulation and thrombosis in various pathological conditions.  
375 Especially, a pivotal role of RBCs in thrombosis has been well and reiteratively explained  
376 in recent reviews published in major journals in hematology (Byrnes JR, et al. *Blood*. 2017  
377 [130\(16\):1795-1799](#); Matthew F. et al. *Blood*. 2012 [120\(18\):3837-3845](#); Weisel JW, et al. *J*  
378 *Thromb Haemost.* 2019 [17\(2\):271-282](#)). These reviews highlight that PS exposure of RBCs  
379 can induce procoagulant activity, which is directly linked with the promotion of thrombosis.  
380 In line with this, our results showed that *V. vulnificus*-infected RBCs increases thrombin  
381 generation by the exogenous addition with factor Xa, factor Va and factor II (prothrombin)  
382 in a MOI-, and time-dependent manner (Fig 2g), indicating that PS-exposing RBCs can  
383 trigger thrombin generation, ultimately leading to coagulation and thrombosis.

384 Furthermore, it is well-established that the impairment of procoagulant-anticoagulant  
385 balance can lead to thrombosis in various clinical settings (van Baal, et al. *Thromb*  
386 *Haemost.* 2000 [83\(01\):9-34](#); Stuijver, DJ, et al. *Thromb. Haemost.* 2012 [108\(6\):077-1088](#)),  
387 indicating that *V. vulnificus* infection-induced RBC PS exposure can trigger thrombin  
388 generation in the blood, ultimately leading to clinically important thrombus formation. This  
389 is fully confirmed by our *in vivo* study where normal healthy rats infected with *V. vulnificus*  
390 showed increased thrombus formation, while those infected with *rtxA* deletion mutant didn't  
391 (Fig. 4e, f). Besides, even in the absence of blood coagulation factors, PS-exposing RBCs  
392 show increased endothelial cell attachment (Fig. 2h) and RBC aggregation (Fig. 2i),  
393 indicating that *V. vulnificus* infection-induced RBC PS exposure can explain various  
394 hematologic complications of *V. vulnificus* infection.

395 **Comments #2: With the exception of sepsis, there is little data supporting the idea that**  
396 ***Vibrio vulnificus* triggers coagulation.**

397 **Response:** We understand that the reviewer raised the question regarding the clinical  
398 evidence of our study to *V. vulnificus* infection. Indeed, clinical case reports directly linked  
399 with coagulation were mainly about sepsis following *V. vulnificus* infection. However, there  
400 were case reports about the clinical symptoms related with the circulatory disorders from  
401 blood clotting and blockade of venous vessel such as deep vein thrombosis (You JS, et al.  
402 *Am J Emerg Med.* 2012 **30**(9):2098.e5-6; Torres L, et al. *Eur J Clin Microbiol Infect Dis*  
403 2002, **21**:537-538; Hong GL, et al. *Burns.* 2012 **38**(2):290-295; Matsuoka Y., et al. *Braz J*  
404 *Infect Dis.* 2013 **17**(1):7-12; Mascola, L., et al. CDC MMWR. 1996 **45**:621-624), supporting  
405 the clinical relevance of our study.

406 In addition, there are some reports that many people with *V. vulnificus* infection require the  
407 surgery of lower limb amputation (Tsai YH, et al. *J Trauma*, 2009 **66**(3):899-905; Matsuoka  
408 Y., et al. *Braz J Infect Dis.* 2013 **17**(1):7-12), which is mainly caused by the blockade of  
409 peripheral blood vessels resulting in the necrosis of the affected tissue. It has been also reported  
410 that lower limb amputation in hospital is frequently associated with deep vein thrombosis,  
411 suggesting that thrombosis might be an important pathogenicity of *V. vulnificus* (Burke B, et  
412 al. *Am J Phys Med Rehabil.* 2000 **79**(2):145-149; Yeager RA, et al. *J Vasc Surg.* 1995  
413 **22**(5):612-615). We consider that these reports sufficiently support that *V. vulnificus* triggers  
414 coagulation.  
415

416 **Comments #3: MARTX toxin similar to listeriolysin and alpha hemolysin toxin are**  
417 **designed to lyse RBC. The pathophysiological significance of studying sub-hemolytic**  
418 **doses of MARTX is questionable.**

419 **Response:** Previous studies demonstrated that hemolysis is not an abrupt but progressively  
420 occurring event. Even though *bona fide* hemolysis, i.e., the rupture of RBCs is not shown at  
421 sub-hemolytic doses, significant changes in RBC membranes can precede such as  
422 morphological and biochemical perturbations as we demonstrated in our study (Fig. 1c, e).  
423 Even at this sub-hemolytic doses, RBCs exposed PS and shed PS-bearing microvesicles,  
424 which could actively promote coagulation pathways (Fig. 2a, g). Although, at hemolytic  
425 doses, these phenomena would get much stronger and severer via the additional generation  
426 of PS-bearing RBC debris (Bian Y, et al. *Food Chem Toxicol*, 2019 **131**:110553), the  
427 pathophysiological features of RBCs observed with sub-hemolytic doses of *V. vulnificus*  
428 may provide more essential clues to understand the progression of its pathogenesis.

429

430 **Comments #4: *Vibrio vulnificus* express metalloproteases that activate prothrombin to**  
431 **thrombin. In addition, these proteases cleave fibrinogen but this does not form a clot.**  
432 **Since this is a Gram-negative bacteria it is likely that like *E. coli* and other Gram-**  
433 **negative bacteria the mechanism of activation of coagulation is due to induction of**  
434 **tissue factor expression on monocytes.**

435 **Response:** The reviewer raised another interesting hypothesis to explain the increased  
436 coagulation in *V. vulnificus* infection.

437 It is a significant point which deserves additional paragraph of discussion. Chang et al.  
438 reported that *V. vulnificus* can secrete an extracellular metalloprotease which can produce  
439 thrombin and lyse fibrin (Chang AK, et al. *J Bacteriol.* 2005 **187**(20):6909-16). Incidentally,  
440 these authors stated that the thrombin activating effect of *V. vulnificus* was only transient  
441 and temporary. We understand that in addition to the involvement of these proteases, there  
442 may be other unknown factors contributing to the *V. vulnificus*-induced coagulation. So, to  
443 rule out factors other than MARTX toxin-induced procoagulant activity of RBC, we  
444 compared *V. vulnificus* wild type and *rtxA* deletion mutant of *V. vulnificus* in our *in vitro*  
445 and *in vivo* experiments (Fig. 3b, c, f and Fig. 4f). The *rtxA* deletion mutant of *V. vulnificus*  
446 only induced minimal level of thrombosis *in vivo*. Furthermore, an additional experiment  
447 was performed with a revertant of the *rtxA* deletion mutant as indicated red dot.

448

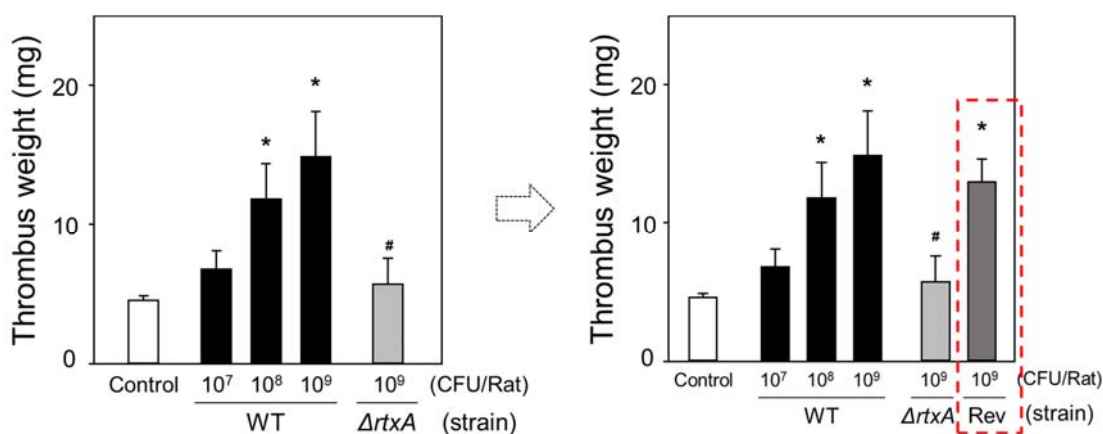

449

450 **Fig. 4f** Original submission (left) and a new data with an additional experiment with the  
451 revertant of the *rtxA* deletion mutant (right)

452 The revertant of the *rtxA* deletion mutant restored the ability of *V. vulnificus* to increase  
453 thrombogenesis along with the procoagulant activities of RBCs, as consistently with *in vitro*  
454 data (Supplementary Fig. 3b, c). These results support our conclusion that MARTX toxin of  
455 *V. vulnificus* is mainly responsible for the procoagulant activity of RBCs and thrombus  
456 formation *in vivo*.

457 Regarding the tissue factor issue raised by reviewer #4, it is possible that the synergistic  
458 effect *in vivo* might occur by the increased tissue factor expression. Since the study on these  
459 synergy needs a series of experiments beyond the scope of the current study, we would like  
460 to investigate further in another independent study. We hope that the reviewer could agree  
461 with our view.

462 **(Revised, New paragraph in Discussion section)**

463 *V. vulnificus* infection accompanies the circulatory disorders from blood clotting and

464 blockade of venous vessel such as deep vein thrombosis (You JS, et al. *Am J Emerg Med.*  
465 2012 **30**(9):2098.e5-6; Torres L, et al. *Eur J Clin Microbiol Infect Dis.*2002 **21**:537-538;  
466 Hong GL, et al. *Burns.* 2012 **38**(2):290-295; Matsuoka Y., et al. *Braz J Infect Dis.* 2013  
467 **17**(1):7-12; Mascola, L., et al. CDC MMWR. 1996 **45**:621-624), highlighting the  
468 importance of thrombosis for the pathological complications of *V. vulnificus* infection.  
469 However, the mechanism underlying *V. vulnificus* infection-associated thrombosis has not  
470 been fully elucidated. Thrombosis is a complex multifactorial process, which involves  
471 various blood coagulation factors and cells other than RBCs. Chang et al. reported that *V.*  
472 *vulnificus* can secrete an extracellular metalloprotease, which can produce thrombin and  
473 lyse fibrin (Chang AK, et al. *J Bacteriol.* 2005 **187**(20):6909-16). However, they indicated  
474 that the thrombin activating effect of *V. vulnificus* was only transient or temporary. Here, we  
475 focused on the role of RBCs and MARTX toxin in coagulation and thrombosis associated  
476 with *V. vulnificus* infection. A pivotal role of RBCs in thrombosis has been well explained  
477 in recent reviews published in major journals in hematology (Byrnes JR, et al. *Blood.* 2017  
478 **130**(16):1795-1799; Matthew F. et al. *Blood.* 2012 **120**(18):3837-3845; Weisel JW, et al. *J*  
479 *Thromb Haemost.* 2019 **17**(2):271-282). These reviews highlight that PS exposure of RBCs  
480 can induce procoagulant activity. In accordance with this, our results showed that the *V.*  
481 *vulnificus*-infected RBCs increase thrombin generation by the exogenous addition of factor  
482 Xa, factor Va and factor II (prothrombin) in an MOI-dependent and a time-dependent  
483 manner (Fig 2g), indicating that the PS-exposing RBCs can trigger thrombin generation,  
484 ultimately leading to coagulation and thrombosis.

485 Furthermore, the impairment of procoagulant-anticoagulant balance can lead to thrombosis  
486 in various clinical settings (van Baal, et al. *Thromb Haemost.* 2000 **83**(01), 29-34; Stuijver,  
487 DJ, et al. *Thromb Haemost.* 2012 **108**(6):1077-1088), indicating that the *V. vulnificus*  
488 infection-induced RBC PS exposure can trigger thrombin generation in the blood, ultimately  
489 leading to clinically important thrombus formation. This was fully demonstrated by our *in*  
490 *vivo* study where normal healthy rats infected with *V. vulnificus* showed increased PS  
491 exposure of RBCs and thrombus formation while those infected with the *rtxA* deletion  
492 mutant did not show an increase. Furthermore, even in the absence of blood coagulation  
493 factors, the PS-exposing RBCs show increased endothelial cell attachment (Fig. 2h) and  
494 RBC aggregation (Fig. 2i), indicating that the *V. vulnificus* infection-induced RBC PS  
495 exposure can explain various hematologic complications of *V. vulnificus* infection.  
496 Moreover, the revertant of the *rtxA* deletion mutant rescued the ability of *V. vulnificus*  
497 to increase thrombus formation (Fig. 4e, f), confirming that the MARTX toxin of *V. vulnificus*  
498 is mainly responsible for the procoagulant activity of RBCs and thrombus formation.

499

500 **Comments #5:** The rat studies show enhanced venous thrombosis. This model requires  
501 tissue factor as a trigger. What is not show are levels of circulating PS-positive  
502 extracellular vesicles. A model of disseminated intravascular coagulation would be a  
503 better model rather than venous thrombosis.

504 **Response:** Our goal is to investigate the role of RBCs in coagulation and thrombosis.  
505 Therefore, venous thrombosis animal model is the most appropriate to evaluate the role of  
506 *V. vulnificus*-infected RBCs on the increased thrombotic risk *in vivo* since the thrombus  
507 formed in this model is mainly composed of RBCs and fibrin clots with only a few platelets  
508 (Vogel GM, et al. *Thromb Res.* 1989 **54**(5):399-410). We have provided this additional

509 information in line 368 of Methods Section as below.

510 **(Original, Line 368)** For *in vivo* studies, the rat abdomen was surgically opened, ----

511 **(Revised, Line 417)** For *in vivo* studies, a venous thrombosis rat model was used, based  
512 upon the previous report that thrombus formed in this model was due to RBCs and fibrin  
513 clots with only a few platelets (Vogel GM, et al. *Thromb Res.* 1989 **54**(5):399-410). The rat  
514 abdomen was surgically opened, -----

515 As the reviewer pointed out, in our venous thrombosis rat model, rats were infected with *V.*  
516 *vulnificus* and then infused with tissue thromboplastin in order to expedite the thrombus  
517 formation according to the original method paper (Berry CN, et al. *Br J Pharmacol.* 1994  
518 **113**(4):1209-1214; Bian Y, et al. *Part Fibre Toxicol.* 2021 **18**(1):28; Peternel, L, et al.  
519 *Thromb Res.* 2005 **115**(6):527-534). The reviewer #4 suggested a model of disseminated  
520 intravascular coagulation (DIC) using TF-induced system to examine whether *V. vulnificus*  
521 triggers coagulation cascade. However, DIC is known to address the dysregulation of  
522 processes in coagulation and fibrinolysis including thrombocytopenia, elevated D-dimer  
523 concentration, decreased fibrinogen concentration, and alteration of clotting times. However,  
524 DIC model provides only limited information on RBC abnormalities, which deterred the  
525 adoption of this model in our study.

526 Regarding the absence of data on the PS-positive extracellular vesicles *in vivo*, unlike *in*  
527 *vitro* experiments, there are many factors interfering the assay to detect PS positive vesicles  
528 in whole blood system *in vivo*. Furthermore, it is hard to identify the tissue origin of vesicles.  
529 To clarify these issues, we performed another experiment to observe the morphological  
530 change of RBCs *in vivo*. One hour after iv injection of *V. vulnificus* wild type and *rtxA*  
531 deletion mutant to rats, blood was collected to observe RBCs using scanning electron  
532 microscopy. Representative image was shown below for review #4. Consistent with *in vitro*  
533 results (Fig. 1c), administration of wild type induced morphological changes of RBCs into  
534 echinocytes, implying that microvesicles were secreted from RBCs *in vivo* (Allan D, et al.  
535 *Nature*, 1976 **261**(5555):58-60). On the other hand, injection of *rtxA* deletion mutant did not  
536 change the shape compared to the untreated control.

537

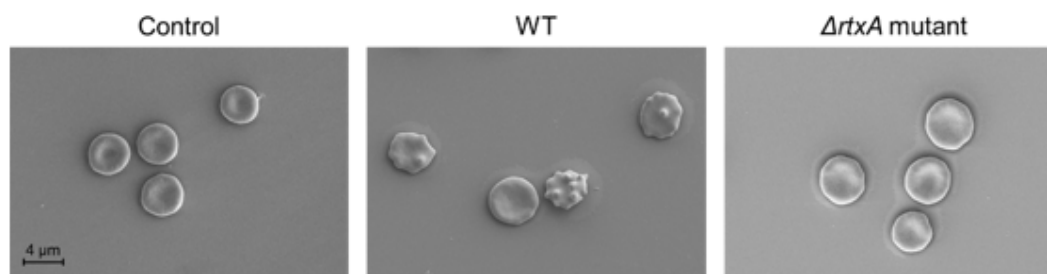

538

539

540

**Fig.** *In vivo* morphological changes of RBCs following injection with  
*V. vulnificus* wild type (middle) and *rtxA* deletion mutant (right) to rats

541

542

543

To further address the reviewer's comment, we have performed another experiment, which showed that *V. vulnificus* infection can induce MV generation in rat RBCs *in vitro*. Fig. 4a

544 has been replaced with the new one bearing MV generation (red dot box) as shown on the  
545 right.

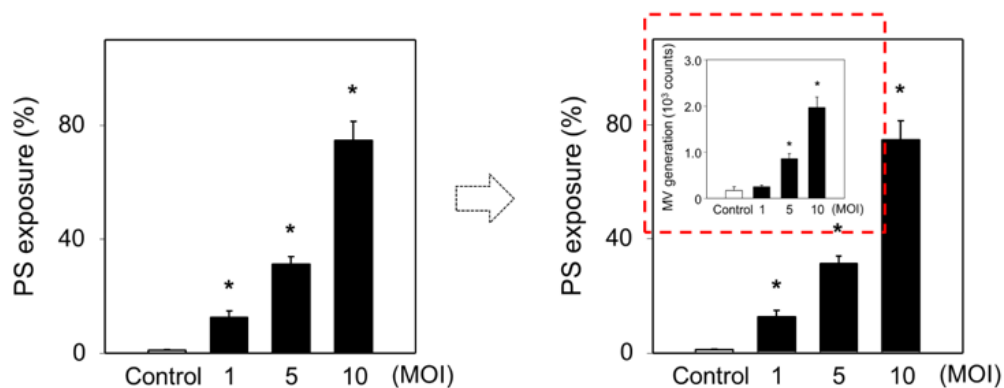

546

547 **Fig. 4a** RBCs PS exposure (left) and PS-bearing MV generation in rat RBCs (right)

548

549 Collectively, we think that the understanding of pathophysiology of *V. vulnificus* infection  
550 is key to diagnosis and treat the patients infected with *V. vulnificus*. For this, we believe that  
551 our study provides important and novel mechanistic data and various markers which can be  
552 of use to develop effective diagnosis tool following up the prognosis of *V. vulnificus* infected  
553 patients.

554

We hope that the reviewer #4 could be satisfied with our responses.

## REVIEWER COMMENTS

### Reviewer #3 (Remarks to the Author):

The authors responses to my comments were mostly reasonable and satisfactory. However, my third comment dealt with the in vivo thrombosis results in Fig. 4. I had stated that either the complemented mutant should be included or the WT, insertion mutant and revertant should be compared. The authors' response was that they included "a revertant of the rtxA deletion mutant", which doesn't make sense. Based on their previous papers, this mutant is deleted for most of the rtxA gene so the full rtxA gene cannot be restored by reversion. It appears the authors are using the revertant derived from their insertion mutant (with derivation as shown in Suppl. Fig. 3). In their revised description of the results for Fig. 4 (lines 193-196) they state "In contrast, rats infected with the (delta)rtxA mutant did not show any significant increase in thrombus formation when compared with the uninfected control. Furthermore, the revertant of the (delta)rtxA mutant rescued the ability of *V. vulnificus* to increase thrombus formation..." Again, this description is incorrect. I think it's likely that the authors' overall conclusions are correct in this paper. However, the in vivo experiment needs to be done correctly. If they're going to show the results of the rtxA deletion mutant then the complemented mutant needs to be included to confirm that defective in vivo thrombus formation by this mutant is due to its rtxA deletion per se. Alternatively, they can show results for the rtxA insertion mutant and its revertant.

### Reviewer #4 (Remarks to the Author):

The authors have performed additional experiments that have improved the manuscript. The data (line 537 on the rebuttal) on RBC morphology in RBC isolated from control rats and rats infected with WT and mutant bacteria is important and should be included in the manuscript.

#### Major comments

1/ The authors are not experts in coagulation and are misinterpreting their data and the literature. Their response to my comments reveals that lack of understanding of coagulation. They also refer to case reports as evidence for thrombosis in patients infected with *Vibrio vulnificus*. This is a rather weak response to my concern that there is very little literature showing that these patients exhibit a high rate of venous thrombosis.

2/ The authors are correct that there are some diseases, such as sickle cell disease, where this is an association between increased PS exposure on RBC and thrombosis/vascular congestion. However, importantly, PS exposure on RBCs alone is not sufficient to initiate coagulation. An increase in PS-exposure on RBCs or other cells, such as platelets, enhances coagulation but does not trigger coagulation. There are 2 ways to trigger coagulation. First, exposure of tissue factor in the vessel wall (hemostasis) or induction of tissue factor on circulating cells, such as monocytes (pathological activation



of coagulation and thrombosis). This is called the extrinsic pathway whereby the tissue factor/factor VIIa complex activates factor X and factor IX. The second pathway is the intrinsic pathway and is driven by the activation of factor XII that then activates factor XI and then this activates FIX. Bacterial infections can lead to induction of tissue factor expression on monocytes and/or activation of factor XII by long chain polyphosphates.

The authors add exogenous factor Xa, factor Va and prothrombin to infected RBCs exposing PS and conclude that the PS-positive RBCs are triggering coagulation. This is not correct. Where did the factor Xa come from in vivo? It must come from either the extrinsic or intrinsic pathway.

The authors nicely demonstrate that *Vibrio vulnificus* infection increases PS exposure on RBC and this is procoagulant. However, they must put this observation into context with what is known about coagulation and add a discussion that they are studying a downstream component of blood coagulation and not the upstream component. Without this paragraph the study's full significance will not be appreciated by the coagulation community.

1 Reviewer's Comment by Reviewer #3

2 The authors responses to my comments were mostly reasonable and satisfactory.  
3 However, my third comment dealt with the *in vivo* thrombosis results in Fig. 4. I had  
4 stated that either the complemented mutant should be included or the WT, insertion  
5 mutant and revertant should be compared. The authors' response was that they included  
6 "a revertant of the *rtxA* deletion mutant", which doesn't make sense. Based on their  
7 previous papers, this mutant is deleted for most of the *rtxA* gene so the full *rtxA* gene  
8 cannot be restored by reversion. It appears the authors are using the revertant derived  
9 from their insertion mutant (with derivation as shown in Suppl. Fig. 3). In their revised  
10 description of the results for Fig. 4 (lines 193-196) they state "In contrast, rats infected  
11 with the ( $\Delta$ )*rtxA* mutant did not show any significant increase in thrombus formation  
12 when compared with the uninfected control. Furthermore, the revertant of the ( $\Delta$ )  
13 *rtxA* mutant rescued the ability of *V. vulnificus* to increase thrombus formation..." Again,  
14 this description is incorrect. I think it's likely that the authors' overall conclusions are  
15 correct in this paper. However, the *in vivo* experiment needs to be done correctly. If  
16 they're going to show the results of the *rtxA* deletion mutant then the complemented  
17 mutant needs to be included to confirm that defective *in vivo* thrombus formation by this  
18 mutant is due to its *rtxA* deletion per se. Alternatively, they can show results for the *rtxA*  
19 insertion mutant and its revertant.

20 **Response:** We really appreciate the reviewer's comments to point out that the *rtxA* insertion  
21 mutant (*rtxA::nptI*) should have been used rather than the deletion mutant ( $\Delta$ *rtxA*) in *in vivo*  
22 thrombosis experiments (Fig. 4f, g). As the reviewer indicated, an *in vivo* experiment using  
23 *rtxA* insertion mutant (*rtxA::nptI*) was performed in order to compare the thrombus  
24 formation of the revertant made from the insertion mutant, which confirmed our conclusion.  
25 Fig. 4f, g has been modified as shown in the next page.

26 Also, the text describing the results of Fig. 4f, g has been modified as follows,

27 **(Original, the last paragraph of Results section)**

28 In contrast, rats infected with the  $\Delta$ *rtxA* mutant did not show any significant increase in  
29 thrombus formation when compared with the uninfected control. Furthermore, the revertant  
30 of the  $\Delta$ *rtxA* mutant rescued the ability of *V. vulnificus* to increase thrombus formation, as  
31 consistent with *in vitro* data (Supplementary Fig. 4b, c).

32 **(Revised, the last paragraph of Results section)**

33 In contrast, rats infected with the deletion mutant ( $\Delta$ *rtxA*) as well as the insertion mutant  
34 (*rtxA::nptI*) did not show any significant increase in thrombus formation when compared  
35 with the uninfected control. Furthermore, the revertant of the insertion mutant (*rtxA::nptI*)  
36 rescued the ability of *V. vulnificus* WT to increase thrombus formation (Fig. 4f, g), as  
37 consistent with *in vitro* data (Supplementary Fig. 4b, c).

(Original Fig. 4f)

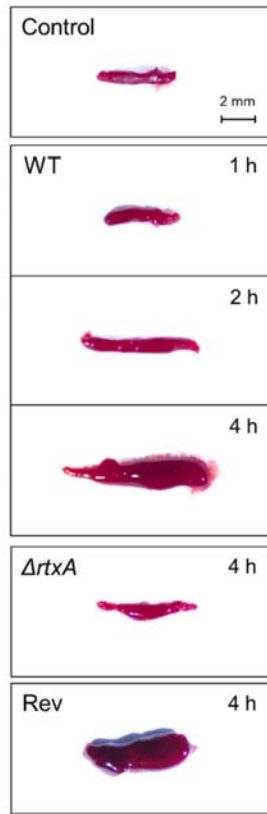

(Revised Fig. 4f)

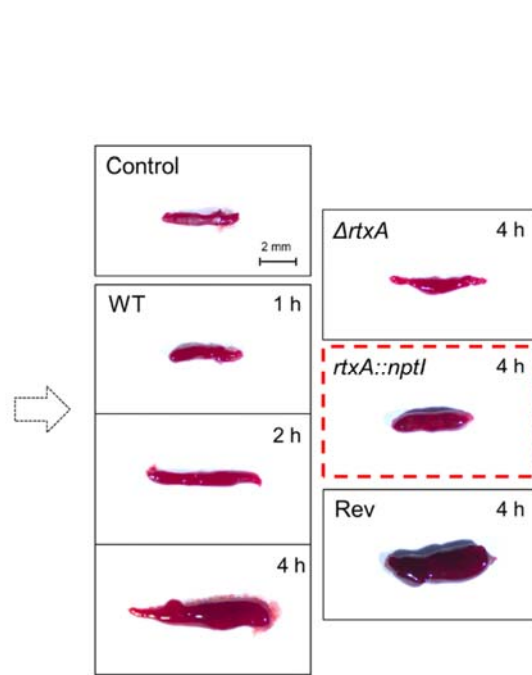

38

39 **Fig. 4f** Original thrombus images *in vivo* (left) and a new data from an additional  
40 experiment with the *rtxA* insertion mutant (*rtxA::nptI*) (right)

41

(Original Fig. 4g)

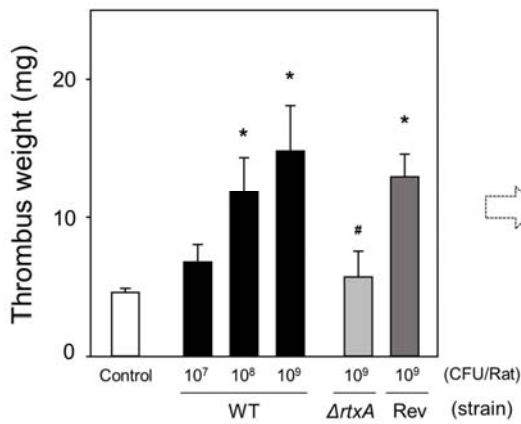

(Revised Fig. 4g)

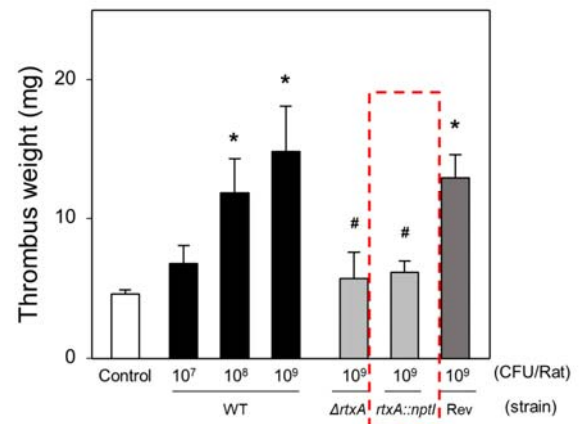

42

43 **Fig. 4g** Original figure (left) and a new data from an additional experiment with  
44 the *rtxA* insertion mutant (*rtxA::nptI*) (right)

45 [Reviewer's Comments by Reviewer #4](#)

46 **General comments:**

47 **The authors have performed additional experiments that have improved the manuscript.**  
 48 **The data (line 537 on the rebuttal) on RBC morphology in RBC isolated from control rats**  
 49 **and rats infected with WT and mutant bacteria is important and should be included in**  
 50 **the manuscript.**

51 **Response to general comments:** When we made the first revision, we intended to perform  
 52 the independent complete study on 'e.g. The role of *rtxA* on morphological change of RBCs  
 53 infected with *V. vulnificus*'. We, however, agree with the reviewer's point that this *in vivo*  
 54 data provide an important piece of information to demonstrate the consistency with *in vitro*  
 55 morphological observations (Fig. 1c, e) and to support the role of RBCs *in vivo*. Now, we  
 56 have included the *in vivo* RBC morphological data into Fig. 4d and added the text in the  
 57 Results section as follows,

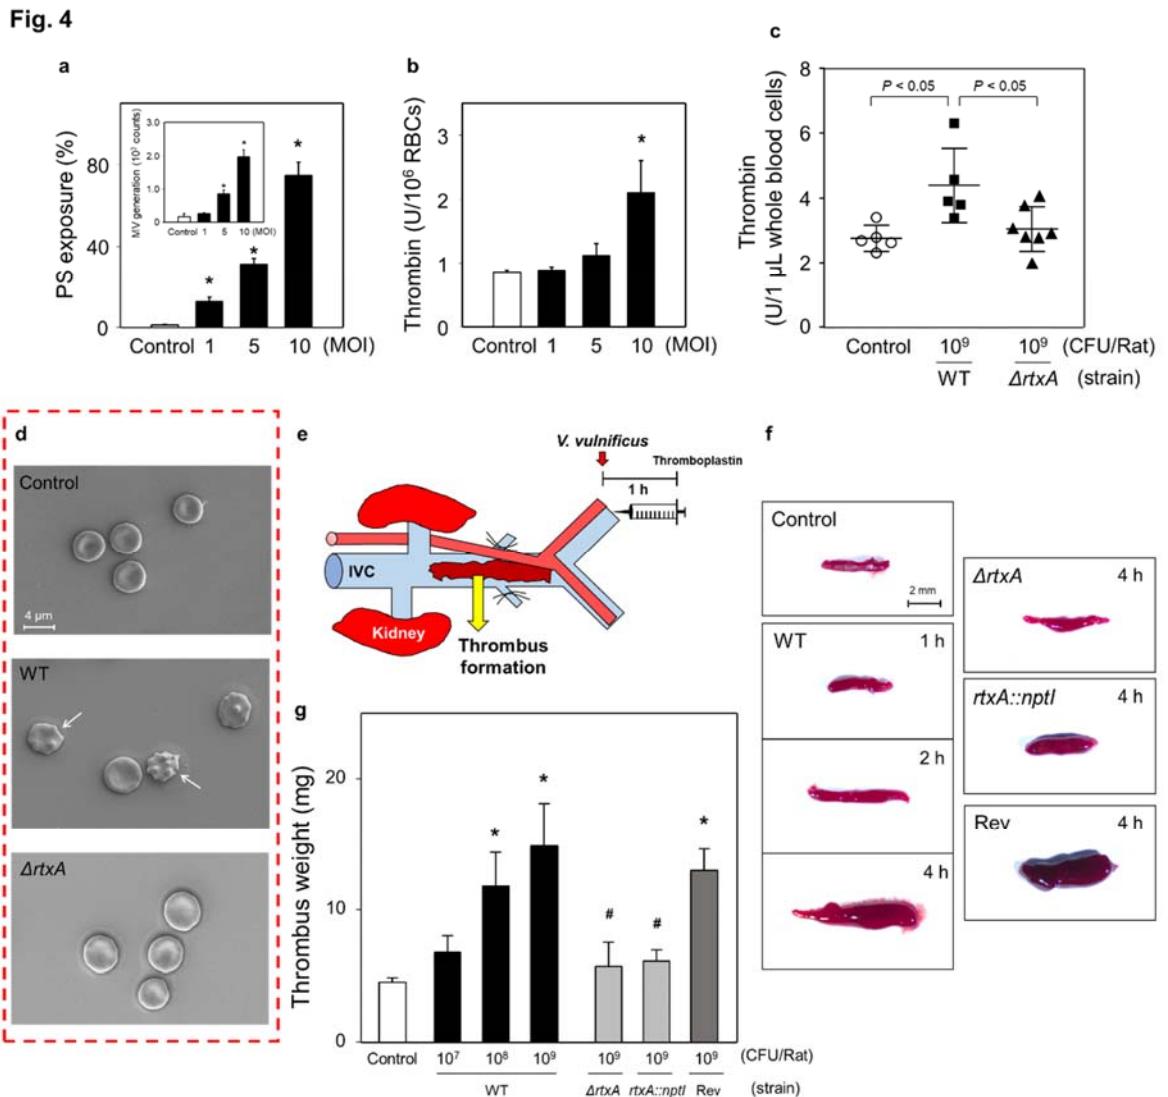

58

59 (Revised, the last paragraph of Results section)

60 In order to observe the morphological change of RBCs following *V. vulnificus* infection *in vivo*, blood was collected 1 h after IV injection of WT and *ArtxA* mutant to rats.  
61 Representative image of RBCs was observed under scanning electron microscopy (Fig. 4d).  
62 Consistently with *in vitro* results (Fig. 1c, e), administration of WT induced morphological  
63 changes of RBCs into echinocytes (white arrows), implying that PS-bearing microvesicles  
64 were formed from RBCs *in vivo* following *V. vulnificus* infection. On the other hand,  
65 injection of the *ArtxA* mutant did not change the shape compared to the untreated control.  
66

67

68 **Comments #1:** The authors are not experts in coagulation and are misinterpreting their  
69 data and the literature. Their response to my comments reveals that lack of  
70 understanding of coagulation. They also refer to case reports as evidence for thrombosis  
71 in patients infected with *Vibrio vulnificus*. This is a rather weak response to my concern  
72 that there is very little literature showing that these patients exhibit a high rate of venous  
73 thrombosis.

74 **Response:** Regarding the coagulation issue mentioned in the first two sentences, we will  
75 respond in the following comments #2. Even though we provided some references on case  
76 reports of venous thrombosis in the previous revision, we understand the reviewer's concern  
77 that there are not enough evidences for venous thrombosis in *V. vulnificus*-infected patients.  
78 Since *V. vulnificus* infection can lead an acute and rapidly fatal disease with wide clinical  
79 spectrum of symptoms, standard duplex ultrasound imaging test may not be applicable for  
80 diagnosis of deep vein thrombosis.

81 We, however, have searched for the clinical literature on *V. vulnificus*-infected patients in  
82 order to provide indirect evidences supporting *V. vulnificus*-infected patients may suffer a  
83 significant rate of venous thrombosis.

84 1) The levels of D-dimer in blood were clinically used to diagnose deep vein thrombosis,  
85 pulmonary embolism, and disseminated intravascular coagulation, etc. Most references  
86 showed that D-dimer level in *V. vulnificus*-infected patients were much higher than a  
87 normal range (<400 ng/mL) (Choi HJ, et al. *J Dermatol.* 2005 **32**(1):48-51; Horseman  
88 MA, et al. *Int J Infect Dis.* 2011 **15**(3):e157–e166; Yu W, et al. *Int J Infect Dis.* 2017  
89 **59**:1-6). For example, Yu et al. reported that D-dimer levels of 6 patients with *V.*  
90 *vulnificus* infection were far beyond the normal range (465, 1293, 9541, 8394, 1841, and  
91 946 ng/mL, respectively), indicating that the patients experienced a blood clotting  
92 condition.

93 2) Matsuoka et al. reported 12 cases study infected with *V. vulnificus* in Japan showing that  
94 all patients exhibited fever, redness, swelling and sharp pain in the lower limbs at the  
95 first medical examination which symptom is closely related to deep vein thrombosis  
96 (Matsuoka Y, et al. *Braz J Infect Dis.* 2013 **17**(1):7-12). Seven of 12 patients were dead  
97 and 5 patients survived underwent amputation surgery. Another study showed that lower  
98 limbs and lower extremities were obvious location of clinical symptoms in all six  
99 patients infected with *V. vulnificus* (Yu W, et al. *Int. J Infect Dis.* 2017 **59**:1-6), in  
100 accordance with the lower extremity for most common site of deep vein thrombosis

101 (Ouriel K, et al. *J Vasc Surg.* 2000 **31**(5):895-900). In addition, it has been known that  
102 lower limb amputation in hospital is frequently associated with deep vein thrombosis  
103 (Yeager RA, et al. *J Vasc Surg.* 1995 **22**(5):612-615; Burke B, et al. *Am J Phys Med*  
104 *Rehabil.* 2000 **79**(2):145-149), suggesting that deep vein thrombosis might be an important  
105 pathogenicity of *V. vulnificus*.

106 3) *V. vulnificus* infection causes several distinct syndromes including primary septicemia,  
107 gastroenteritis, necrotizing fasciitis, and cellulitis (Hendren N, et al. *BMJ Case Rep.*  
108 *2017 bcr2017220199*). Many literature stated that more than one half of patients develop  
109 the typical skin lesions of cellulitis which most commonly occurs in the lower leg (Oliver  
110 JD. *Epidemiol Infect.* 2005 **133**(3):383-391; Bross MH, et al. *Am Fam Physician.*  
111 *2007 76*(4):539-544). Cellulitis shares several clinical features with deep vein  
112 thrombosis that makes very difficult to distinguish between cellulitis and deep vein  
113 thrombosis (Maze MJ, et al. *BMC Infect Dis.* 2013 **13**:141). Furthermore, Bersier et al.  
114 suggests a controversial association between cellulitis and deep vein thrombosis (Bersier  
115 D, et al. *J Thromb Haemost.* 2003 **1**(4):867-868). Comparing the number of literature  
116 describing the clinical feature of cellulitis and deep vein thrombosis, we speculate there  
117 may be a high rate of mis-diagnosis between cellulitis and deep vein thrombosis in local  
118 hospital.

119 Our study demonstrate that *V. vulnificus* infection could alter RBCs morphology and  
120 increase PS-exposing RBCs and MVs inducing the procoagulant activity, ultimately leading  
121 to venous thrombosis in animal model. Although deep vein thrombosis has not been known  
122 as one of the major clinical symptoms of *V. vulnificus* infection, our mechanistic study *in*  
123 *vitro* as well as *in vivo* may draw clinician's attention in the future to find the clue to diagnose  
124 and treat *V. vulnificus* infected patients.

125 We hope the reviewer will be satisfied with our response.

126

127 **Comments #2:** The authors are correct that there are some diseases, such as sickle cell  
128 disease, where this is an association between increased PS exposure on RBC and  
129 thrombosis/vascular congestion. However, importantly, PS exposure on RBCs alone is not  
130 sufficient to initiate coagulation. An increase in PS-exposure on RBCs or other cells, such  
131 as platelets, enhances coagulation but does not trigger coagulation. There are 2 ways to  
132 trigger coagulation. First, exposure of tissue factor in the vessel wall (hemostasis) or  
133 induction of tissue factor on circulating cells, such as monocytes (pathological activation  
134 of coagulation and thrombosis). This is called the extrinsic pathway whereby the tissue  
135 factor/factor VIIa complex activates factor X and factor IX. The second pathway is the  
136 intrinsic pathway and is driven by the activation of factor XII that then activates factor  
137 XI and then this activates FIX. Bacterial infections can lead to induction of tissue factor  
138 expression on monocytes and/or activation of factor XII by long chain polyphosphates.

139 The authors add exogenous factor Xa, factor Va and prothrombin to infected RBCs  
140 exposing PS and conclude that the PS-positive RBCs are triggering coagulation. This is  
141 not correct. Where did the factor Xa come from *in vivo*? It must come from either the  
142 extrinsic or intrinsic pathway.

143 **The authors nicely demonstrate that *Vibrio vulnificus* infection increases PS exposure on**  
144 **RBC and this is procoagulant. However, they must put this observation into context with**  
145 **what is known about coagulation and add a discussion that they are studying a**  
146 **downstream component of blood coagulation and not the upstream component. Without**  
147 **this paragraph the study's full significance will not be appreciated by the coagulation**  
148 **community.**

149 **Response:** We acknowledge that we may not be an expert in coagulation cascade pathway  
150 and thus, we toned down the discussion related to the coagulation cascade overall.  
151 Furthermore, we misunderstood the previous comments of reviewer #4 a little. Now, we  
152 could understand clearly what exactly the reviewer concerned, which we think is very  
153 important.

154 We agree that *V. vulnificus* induced RBC PS exposure did not trigger coagulation by itself,  
155 rather it promoted the primed coagulation cascade ultimately leading to increased  
156 thrombosis. To further clarify the role of *V. vulnificus* induced RBC PS exposure in the  
157 coagulation, we performed an additional *in vitro* experiment. As shown below, when the *V.*  
158 *vulnificus* induced PS in RBCs was neutralized by adding the purified Annexin V, thrombin  
159 generation was significantly reduced, suggesting that *V. vulnificus* induced RBC PS  
160 exposure is important for blood coagulation associated with *V. vulnificus* infection.

161

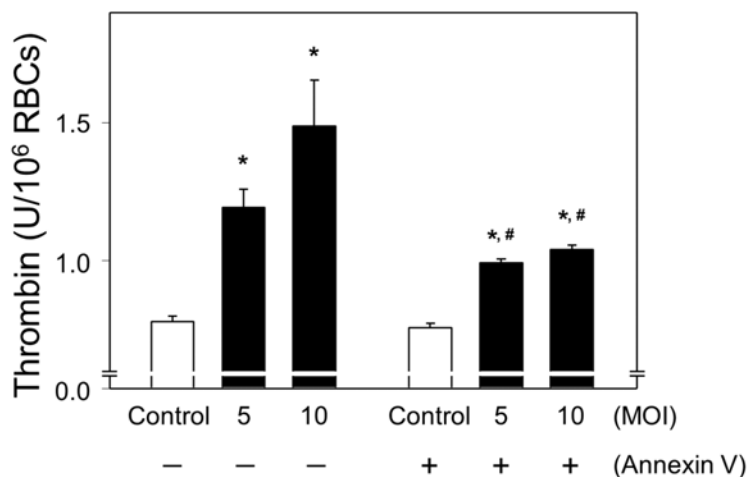

162

163 **Fig.** Effect of purified Annexin V on thrombin generation in *V. vulnificus*-infected RBCs

164

165 Since some readers may find this data interesting, we have added it into Supplementary Fig.  
166 3 and modified the text in the Results and Methods section as follows,

167 **(Revised in Results Section)**

168 **When the exposed PS in RBCs was blocked with purified Annexin V, the procoagulant**  
169 **activity of *V. vulnificus* was attenuated significantly, suggesting that PS exposure plays a key**  
170 **role in *V. vulnificus*-induced procoagulant activity (Supplementary Fig. 3).**



171 **(Revised in Methods section)**

172 In experiments using purified Annexin V (BD Bioscience) (Bae ON, et al. *Chem Res Toxicol.*  
173 2007 10:1760-1768), human RBCs were pre-incubated with the Annexin V (final  
174 concentration 3.5  $\mu$ M) for 10 min, and then infected with *V. vulnificus* at 5, and 10 MOIs for  
175 30 min. Thrombin generation was determined using the prothrombinase assay as mentioned  
176 above.

177

178 Since two paragraphs in Discussion section which was incorporated in the previous revision  
179 following the reviewer #4's comments was not quite relevant to provide the whole picture  
180 of our work into coagulation and thrombosis, we have dissected and reorganized the  
181 structure of paragraph emphasizing the reviewer's 2<sup>nd</sup> comments.

182

183 **(Two previous paragraphs in Discussion section)**

184 *V. vulnificus* infection accompanies the circulatory disorders from blood clotting and  
185 blockade of venous vessel such as deep vein thrombosis<sup>3,5,21,32,33</sup>, highlighting the  
186 importance of thrombosis for the pathological complications of *V. vulnificus* infection.  
187 However, the mechanism underlying *V. vulnificus* infection-associated thrombosis has not  
188 been fully elucidated. Thrombosis is a complex multifactorial process, which involves  
189 various blood coagulation factors and cells other than RBCs. Chang et al. reported that *V.*  
190 *vulnificus* can secrete an extracellular metalloprotease, which can produce thrombin and lyse  
191 fibrin<sup>34</sup>. However, they indicated that the thrombin activating effect of *V. vulnificus* was only  
192 transient or temporary. Here, we focused on the role of RBCs and MARTX toxin in  
193 coagulation and thrombosis associated with *V. vulnificus* infection. A pivotal role of RBCs  
194 in thrombosis has been well explained in recent reviews published in major journals in  
195 hematology<sup>8,9,35</sup>. These reviews highlight that PS exposure of RBCs can induce  
196 procoagulant activity. In accordance with this, our results showed that the *V. vulnificus*-  
197 infected RBCs increase thrombin generation by the exogenous addition of factor Xa, factor  
198 Va and factor II (prothrombin) in an MOI-dependent and a time-dependent manner (Fig 2g),  
199 indicating that the PS-exposing RBCs can trigger thrombin generation, ultimately leading  
200 to coagulation and thrombosis.

201 Furthermore, the impairment of procoagulant-anticoagulant balance can lead to thrombosis  
202 in various clinical settings<sup>36,37</sup>, indicating that the *V. vulnificus* infection-induced RBC PS  
203 exposure can trigger thrombin generation in the blood, ultimately leading to clinically  
204 important thrombus formation. This was fully demonstrated by our *in vivo* study where  
205 normal healthy rats infected with *V. vulnificus* showed increased PS exposure of RBCs and  
206 thrombus formation while those infected with the *rtxA* deletion mutant did not show an  
207 increase. Furthermore, even in the absence of blood coagulation factors, the PS-exposing  
208 RBCs show increased endothelial cell attachment (Fig. 2h) and RBC aggregation (Fig. 2i),  
209 indicating that the *V. vulnificus* infection-induced RBC PS exposure can explain various  
210 hematologic complications of *V. vulnificus* infection. Moreover, the revertant of the *rtxA*



211 deletion mutant rescued the ability of *V. vulnificus* to increase thrombus formation (Fig. 4e,  
212 f), confirming that the MARTX toxin of *V. vulnificus* is mainly responsible for the  
213 procoagulant activity of RBCs and thrombus formation (Move to the 1<sup>st</sup> paragraph in the  
214 Discussion section).

215  
216 **(Revised, Discussion section)**

217 *V. vulnificus* infection may accompany the circulatory disorders from blood clotting and  
218 blockade of venous vessel leading to deep vein thrombosis<sup>3,5,21,32,33</sup>, highlighting the  
219 importance of thrombosis for the pathological complications of *V. vulnificus* infection.  
220 However, the mechanism underlying *V. vulnificus* infection-associated thrombosis has not  
221 been fully elucidated. Here, we investigated the role of RBCs and MARTX toxin in  
222 coagulation and thrombosis associated with *V. vulnificus* infection. A pivotal role of RBCs  
223 in hemostasis and thrombosis has been well explained in recent reviews<sup>8,9,34</sup>. Several  
224 mechanisms were suggested the involvement of RBCs in the promotion of blood coagulation  
225 and thrombosis. RBC aggregation itself promotes deep venous thrombosis by increasing the  
226 hydrodynamic resistance in blood vessels with low shear, such as the veins in the lower  
227 limbs (Yu F, et al. *J Thromb Haemost.* 2011 **9**(3):481-488). In addition to RBC aggregation,  
228 attachment of RBCs to vascular endothelium also plays a role in hemostasis and thrombosis.  
229 Unlike normal RBCs, RBCs are prone to attach to endothelium under certain pathological  
230 conditions such as sickle cell disease (Frenette PS, et al. *J Clin Invest.* 2007 **117**(4):850-858).  
231 It has been suggested that PS exposure in RBCs was linked to an increased adhesion to  
232 endothelium (Yang Y, et al. *J Biol Chem.* 2010 **285**(52):40489-40495; Wautier MP, et al. *J*  
233 *Thromb Haemost.* 2011 **9**(5):1049-1055). Consistently with this notion, our *in vitro* results  
234 demonstrated that PS-exposing RBCs following *V. vulnificus* infection increased endothelial  
235 cell attachment (Fig. 2h) and RBC aggregation (Fig. 2i), indicating that these events may  
236 promote the vascular occlusions associated with venous thrombosis observed in the *V.*  
237 *vulnificus*-infected patients.

238 More attention has recently been paid to the role of PS exposure of RBCs in coagulation and  
239 thrombosis<sup>8,9,34</sup>. Under pathological states, negatively charged PS in the surface of RBC  
240 membrane provides sites for the assembly of prothrombinase complex with factor Xa and  
241 factor Va, which facilitates thrombin generation from prothrombin to enhance blood clotting  
242 and ultimately, promote venous thrombosis<sup>13</sup>. In accordance with this downstream  
243 component of coagulation, our *in vitro* results showed that the PS-exposing RBCs and MVs  
244 occurring upon *V. vulnificus* infection increase thrombin generation by exogenous addition  
245 of factor Xa, and factor Va (Fig. 2g), suggesting that PS-exposing RBCs accelerate the  
246 downstream component of coagulation cascade to promote coagulation *in vivo* even though  
247 coagulation is not triggered by them. Previous studies reported that *V. vulnificus* infection  
248 secretes a metalloprotease to activate factor XII, that involves in the first step of the intrinsic  
249 pathway (Miyoshi S, et al. *Toxicon.* 2004 **44**(8):887-893; Frick IM, et al. *Thromb Haemost.*  
250 **2007 98**(3):497-502; Park JE, et al. *Biochem Biophys Res Commun.* 2014 **450**(2):1099-  
251 **1103**). In addition, there are several reports that infection with bacteria such as  
252 *Staphylococcus aureus* initiates the extrinsic coagulation pathway by inducing tissue factor  
253 production from monocytes and endothelium via inflammatory mediators such as TNF-

254 alpha (Darke TA, et al. *J Infect Dis.* 1988 **157**(4):749-756; Lowy FD. *N Engl J Med.* 1998  
255 **339**(8):520-532; Lopes-Bezerra LM, et al. *Braz J Med Biol Res.* 2003 **36**(8):987-991). There  
256 is no report on the increase of tissue factor expression by *V. vulnificus* infection, but the  
257 levels of TNF-alpha were significantly increased in *V. vulnificus*-infected patients (Powell  
258 JL, et al. *Infect Immun*, 1997 **65**(9):3713-3718; Shin SH, et al. *FEMS Immunol Med*  
259 *Microbiol.* 2002 **33**(2):133-138; Lee NY, et al. *Mol Immunol.* 2011 **49**(1-2):143-154). It is  
260 possible that *V. vulnificus* infection may induce the expression of tissue factor on the surface  
261 of cells such as monocytes by the increased TNF-alpha allowing the complex formation with  
262 factor VII, finally activating Factor X. Collectively, *V. vulnificus* infection may induce  
263 inflammation and activate the upstream coagulation factors such as tissue factor and factor  
264 XII in extrinsic/intrinsic pathway, which culminates in the formation of factors Xa/Va. These  
265 factors Xa/Va readily form the prothrombinase complex in the presence of PS-exposing  
266 RBCs resulting in increased generation of thrombin from prothrombin, ultimately forming  
267 fibrin clot.

268

269

270

We honestly hope that our responses will be enough to satisfy the reviewer.

## REVIEWER COMMENTS

### Reviewer #3 (Remarks to the Author):

The authors have included the results of the rtxA insertion mutant in the in vivo thrombosis experiment shown in Fig. 4. The results now clearly indicate that MARTX toxin is primarily responsible for this pathology associated with *Vibrio vulnificus* infection.

### Reviewer #4 (Remarks to the Author):

#### Chung et al Review

##### Comments.

1/ The title is misleading. MARTX toxin does not “induce” thrombosis through the procoagulant activity of red blood cells. Rather, MARTX toxin induces the exposure of PS on the surface of red blood cells that contributes to thrombosis. The trigger for thrombosis is not studied.

2/ In the abstract, the authors should change “In a rat venous thrombosis model,” to “In a rat venous thrombosis model triggered by tissue factor and stasis, “.

3/ Line 276. “RBC aggregation itself promotes deep vein thrombosis ... 18”. Currently, it is unclear if RBC contribute to venous thrombosis or are simply passively trapped in the clots. I do not believe that RBC aggregation alone is sufficient to induce venous thrombosis. Sickle cell disease is complex and vascular occlusion by RBC and leukocyte aggregates rather than venous thrombosis caused by a clot.

4/ Comment in rebuttal letter. “The levels of D-dimer in blood were clinically used to diagnose deep vein thrombosis, pulmonary embolism, and disseminated intravascular coagulation, etc. Most references 86 showed that D-dimer level in *V. vulnificus*-infected patients were much higher than a 87 normal range. The authors are incorrect. Levels of D-dimer are NOT used to diagnose deep vein thrombosis. Rather, a low level of D-dimer is used to EXCLUDE venous thrombosis.

1 **Reviewer's Comments by Reviewer #4**

2 **Comments #1:** The title is misleading. MARTX toxin does not “induce” thrombosis  
3 through the procoagulant activity of red blood cells. Rather, MARTX toxin induces the  
4 exposure of PS on the surface of red blood cells that contributes to thrombosis. The  
5 trigger for thrombosis was not studied.

6 **Response:** We believe the reviewer #4 suggested more appropriate title to describe our  
7 research clearly. We have previously modified the title adding the phrase ‘Pore-forming  
8 activity of ---’ as the reviewer #1 suggested. Due to the maximum title length is 15 word,  
9 we have changed the title as follows.

10 **(Original Title)** “Pore-forming activity of the MARTX toxin of *Vibrio vulnificus* induces  
11 thrombosis through the procoagulant activity of red blood cells”

12 **(Revised Title)** “MARTX toxin of *Vibrio vulnificus* induces RBC phosphatidylserine  
13 exposure that can contribute to thrombosis”

14

15 **Comments #2:** In the abstract, the authors should change “In a rat venous thrombosis  
16 model,” to “In a rat venous thrombosis model triggered by tissue factor and stasis”.

17 **Response:** As the reviewer suggests to describe the animal model more clearly, we have  
18 modified the text of line 26 in Abstract as follows.

19 **(Original Abstract)** “In a rat venous thrombosis model, ---”

20 **(Revised Abstract)** “In a rat venous thrombosis model triggered by tissue factor and stasis,  
21 ---”

22

23 **Comments #3:** Line 276. “RBC aggregation itself promotes deep vein thrombosis ... 18”.  
24 Currently, it is unclear if RBC contribute to venous thrombosis or are simply passively  
25 trapped in the clots. I do not believe that RBC aggregation alone is sufficient to induce  
26 venous thrombosis. Sickle cell disease is complex and vascular occlusion by RBC and  
27 leukocyte aggregates rather than venous thrombosis caused by a clot.

28 **Response:** We agree with the reviewer’s comments that RBC aggregation alone may not  
29 be sufficient to induce venous thrombosis. Thus, we have modified the text to tone down  
30 the role of increased RBC aggregation in triggering venous thrombosis, as follows,

31 **(Original in Discussion section)** RBC aggregation itself promotes deep venous  
32 thrombosis by increasing the hydrodynamic resistance in blood vessels with low shear,  
33 such as the veins in the lower limbs<sup>18</sup>. In addition to RBC aggregation, attachment of RBCs  
34 to vascular endothelium also plays a role in hemostasis and thrombosis.

35 (Revised in Discussion section) Previous studies suggested that RBC aggregation may  
36 aggravate deep vein thrombosis by increasing the hydrodynamic resistance in the veins in  
37 the lower limbs<sup>9,18</sup>. However, it is yet to be clarified whether *V. vulnificus*-induced RBC  
38 aggregation alone is sufficient to trigger venous thrombosis. Attachment of RBCs to  
39 vascular endothelium also plays a role in hemostasis and thrombosis.

40

41 **Comments #4: Comment in rebuttal letter. “The levels of D-dimer in blood were clinically**  
42 **used to diagnose deep vein thrombosis, pulmonary embolism, and disseminated**  
43 **intravascular coagulation, etc. Most references showed that D-dimer level in *V.***  
44 ***vulnificus*-infected patients were much higher than a normal range. The authors are**  
45 **incorrect. Levels of D-dimer are NOT used to diagnose deep vein thrombosis. Rather, a**  
46 **low level of D-dimer is used to EXCLUDE venous thrombosis.**

47 **Response:** We really sorry for our incorrect statement in the previous rebuttal letter.

48 As the reviewer mentioned, a positive or elevated D-dimer levels may suggest a blood  
49 clotting condition, but it can't discriminate whether the type of clotting condition is DVT,  
50 PE, DIC or stroke etc. On the other hand, low or normal D-dimer levels can exclude the  
51 clotting disorder.

52 We mistakenly overstated the association of the increase D-dimer levels of *V. vulnificus*-  
53 infected patients to the occurrence of deep venous thrombosis.

54

55

56 We honestly hope that our responses will be enough to satisfy the reviewer.
